# Supplementary material
Source: ML conference proceedings conference paper supplement (https://openreview.net/forum?id=hWwY_Jq0xsN)
Supplement: supplementary_material [file attachment]

## Briefing

**Do not take this study on a mobile phone**, the text and images won't display correctly.

**Do not take this study** if you have done a similar one recently.

You are free to leave at any time.

The study will take around 12mins.

You will be paid \$12 per hour for your efforts.

Thank you for your participation!

## Block 53

Please Enter Your Prolific ID Here

## Introduction 1

# Introduction

A **computer program** has learned to drive a car using four actions.

The four actions are:

1. Accelerate
2. Brake
3. Turn Left
4. Turn Right

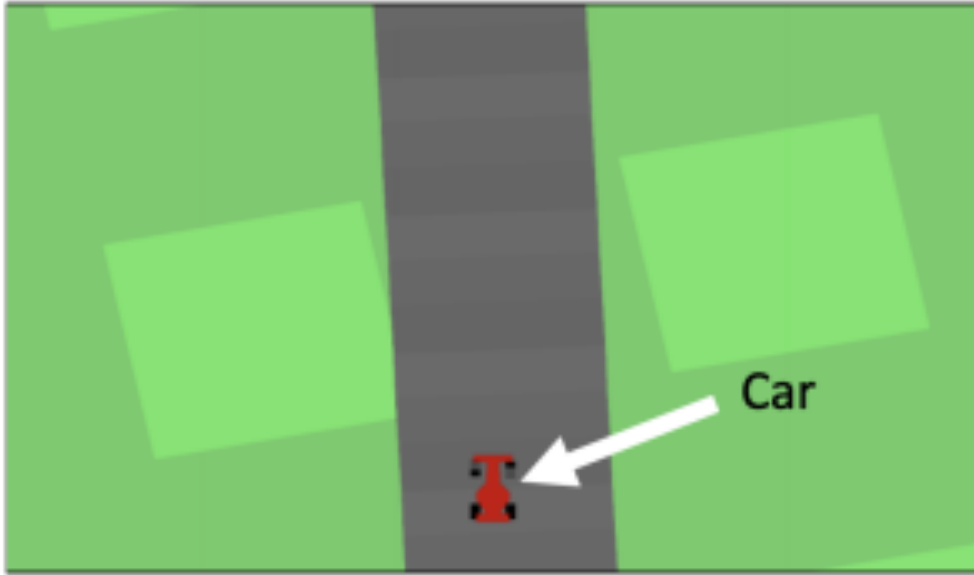

**Important:** *In all images you see, the car is constantly moving forward.*

Introduction 2

# Introduction

The car has learned to drive **very well** by practicing for **millions upon millions of simulations**.

Introduction acc

# Introduction

The car can take the action **ACCELERATE** in situations it thinks needs it.

Introduction brake

# Introduction

The car can take the action **BRAKE** in situations it thinks needs it.

Introduction Right

# Introduction

The car can take the action **TURN RIGHT** in situations it thinks needs it.

Introduction left

# Introduction

The car can take the action **TURN LEFT** in situations it thinks needs it.

Introduction combine

# Introduction

Lastly, the car can combine actions, and will (for example) **TURN RIGHT** and **ACCELERATE at the same time** in situations that it thinks needs it.

## Example 2

# Example

So, for example, the car can turn right when it approaches a right turn.

## Example 3

# Example

As another example, the car can accelerate and turn right if it thinks would help.

## Example 4

# Example

Lastly, the car could also just brake if it thinks it would help.

## Block 51

# Introduction

It is up to you to look at the current situation, and guess **what actions** the car is going to take.

## Your Task

# Your Task!

However, even if the car has learned to drive well, it cannot drive safely when it encounters situations which are EXTREMELY different to what it has experienced before.

*It is up to you to decide if this is happening.*

So, there are two main things you want to consider when predicting if the car will crash:

1. Is the actions the car is going to take safe in the situation?
2. Is the current situation too different to the car's previous experiences that the car has no idea what to do?

Title

# Press Next For The Task Instructions

Instructions 1

## Instructions

Initially, note the car's situation and the road ahead it must try to navigate safely.

**Step 1:** Note the Situation

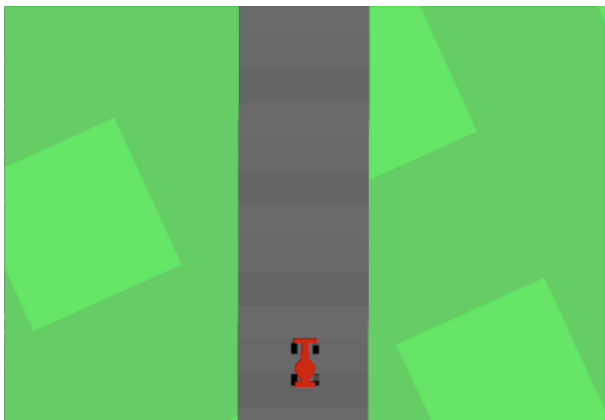

Instructions 2

## Instructions

Secondly, recall the explanation of how the car works (this will NEVER change).

**Step 2:** Recall the explanation of how the car works:

**Explanation:** The car learned to drive very well by practicing for **millions upon millions of simulations.**

Instructions 3

# Instructions

Lastly, **predict if the car will drive safely** through the road ahead, **and your confidence** in this prediction.

There are **five options** ranging from **"Strongly Disagree"** to **"Strongly Agree"**.

**Step 3:**

|                                             | Strongly Disagree     |                       |                       |                       | Strongly agree        |
|---------------------------------------------|-----------------------|-----------------------|-----------------------|-----------------------|-----------------------|
| The car will drive safely in this situation | <input type="radio"/> |
| I am confident in this prediction           | <input type="radio"/> |

Red Obstacles

# Red Obstacles

Lastly, there are red obstacles scattered throughout the roads

If the car crashes into these it will **not drive safely.**

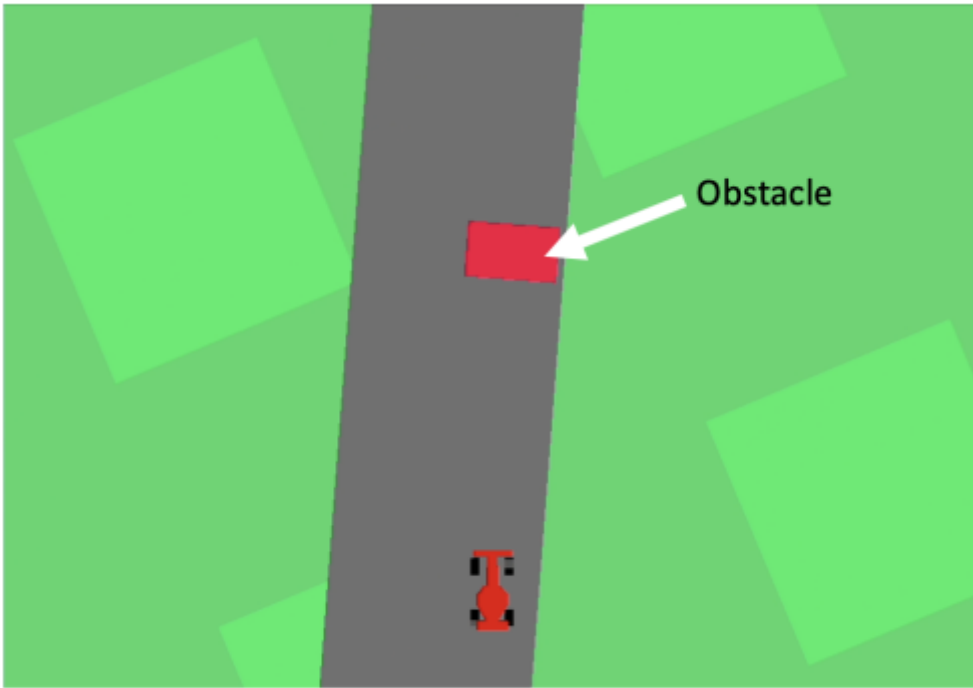

Block 51

Remember, you are trying to predict what the computer program is going to do while driving the car!!!

You are NOT trying to convey how you would personally drive.

Sample question title

## Sample Question

Now, please practice on the next question.

Practice Question

## Practice Question

Step 1: Note the Situation

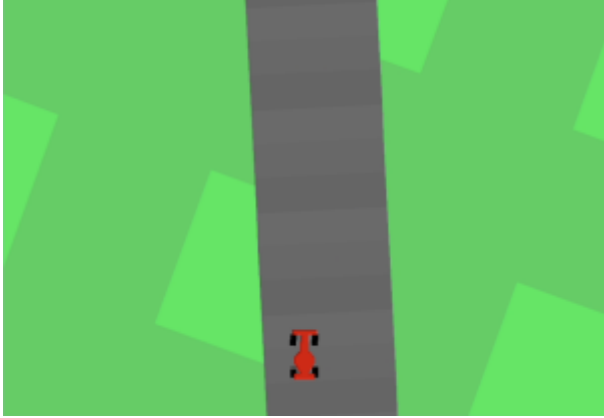

**Step 2:** Recall the explanation of how the car works:

**Explanation:** The car learned to drive very well by practicing for **millions upon millions of simulations.**

**Step 3:**

|                                                | Strongly<br>Disagree  |                       |                       |                       | Strongly<br>agree     |
|------------------------------------------------|-----------------------|-----------------------|-----------------------|-----------------------|-----------------------|
| The car will drive safely<br>in this situation | <input type="radio"/> |
| I am confident in this<br>prediction           | <input type="radio"/> |

**Please... consider answers... carefully**

**Please only participate in this study if you understand the instructions and are willing to consider your answers carefully.**

Click to begin study

**Click Next To Begin The Study**

Question 1

**Question**



Step 1: Note the Situation

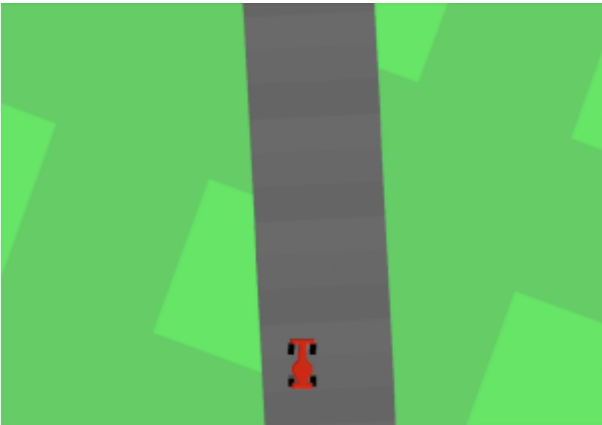

Step 2: Recall the explanation of how the car works:

**Explanation:** The car learned to drive very well by practicing for **millions upon millions of simulations.**

Step 3:

|                                             | Strongly Disagree     |                       |                       |                       | Strongly agree        |
|---------------------------------------------|-----------------------|-----------------------|-----------------------|-----------------------|-----------------------|
| The car will drive safely in this situation | <input type="radio"/> |
| I am confident in this prediction           | <input type="radio"/> |

Question 3

Question

Step 1: Note the Situation

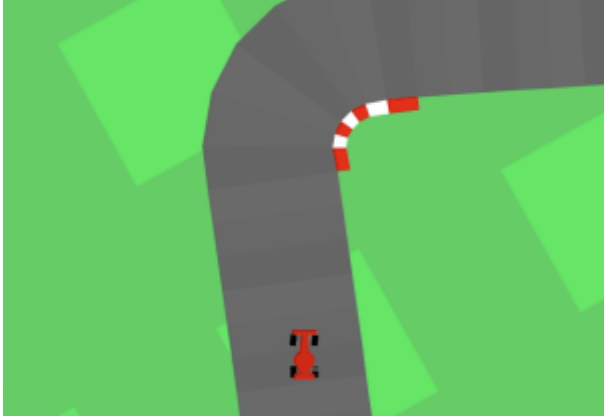

**Step 2:** Recall the explanation of how the car works:

**Explanation:** The car learned to drive very well by practicing for **millions upon millions of simulations**.

**Step 3:**

|                                                | Strongly<br>Disagree  |                       |                       |                       | Strongly<br>agree     |
|------------------------------------------------|-----------------------|-----------------------|-----------------------|-----------------------|-----------------------|
| The car will drive safely<br>in this situation | <input type="radio"/> |
| I am confident in this<br>prediction           | <input type="radio"/> |

**Question 5**

# Question

**Step 1:** Note the Situation

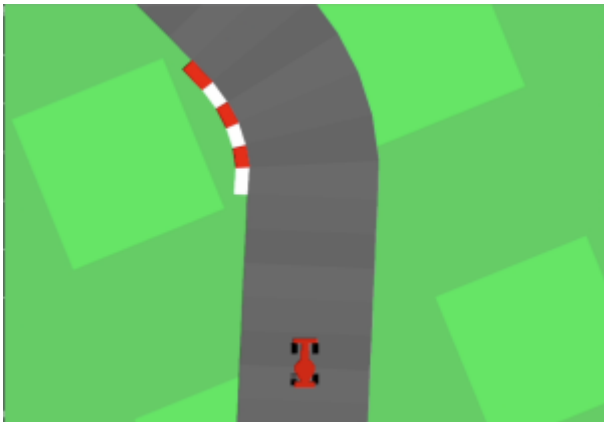

Step 2: Recall the explanation of how the car works:

**Explanation:** The car learned to drive very well by practicing for millions upon millions of simulations.

Step 3:

|                                             | Strongly Disagree     |                       |                       |                       | Strongly agree        |
|---------------------------------------------|-----------------------|-----------------------|-----------------------|-----------------------|-----------------------|
| The car will drive safely in this situation | <input type="radio"/> |
| I am confident in this prediction           | <input type="radio"/> |

Question 7

# Question

Step 1: Note the Situation

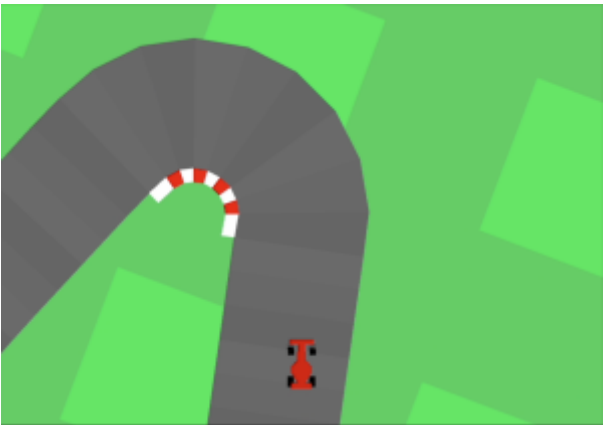

Step 2: Recall the explanation of how the car works:

**Explanation:** The car learned to drive very well by practicing for millions upon millions of simulations.

Step 3:

|                                             | Strongly Disagree     |                       |                       |                       | Strongly agree        |
|---------------------------------------------|-----------------------|-----------------------|-----------------------|-----------------------|-----------------------|
| The car will drive safely in this situation | <input type="radio"/> |

Strongly Disagree

Strongly agree

I am confident in this prediction

Question 9

Question

Step 1: Note the Situation

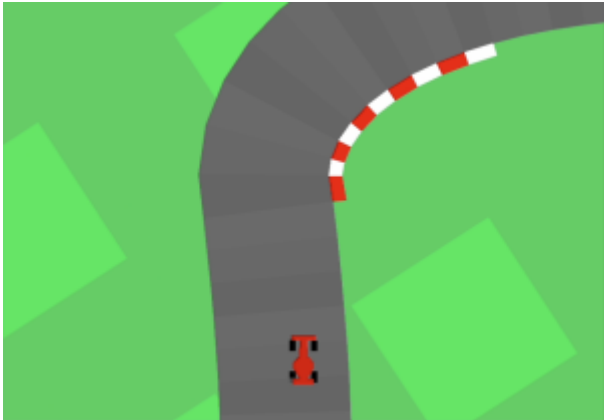

Step 2: Recall the explanation of how the car works:

**Explanation:** The car learned to drive very well by practicing for ***millions upon millions of simulations***.

Step 3:

Strongly Disagree

Strongly agree

The car will drive safely in this situation

I am confident in this prediction

Question 11

Question

Step 1: Note the Situation

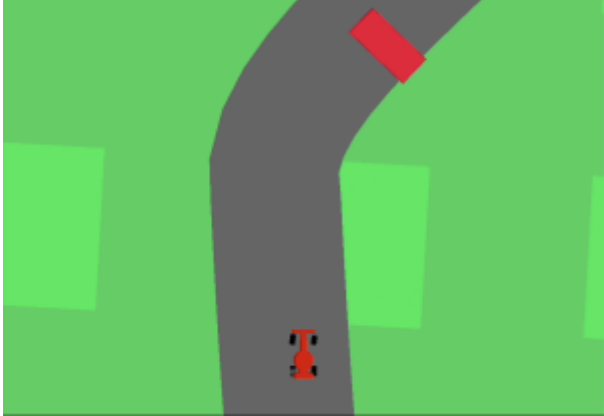

**Step 2:** Recall the explanation of how the car works:

**Explanation:** The car learned to drive very well by practicing for **millions upon millions of simulations**.

**Step 3:**

|                                             | Strongly<br>Disagree  |  |                       |  |                       | Strongly<br>agree     |
|---------------------------------------------|-----------------------|--|-----------------------|--|-----------------------|-----------------------|
| The car will drive safely in this situation | <input type="radio"/> |  | <input type="radio"/> |  | <input type="radio"/> | <input type="radio"/> |
| I am confident in this prediction           | <input type="radio"/> |  | <input type="radio"/> |  | <input type="radio"/> | <input type="radio"/> |

**Question 13**

# Question

**Step 1:** Note the Situation

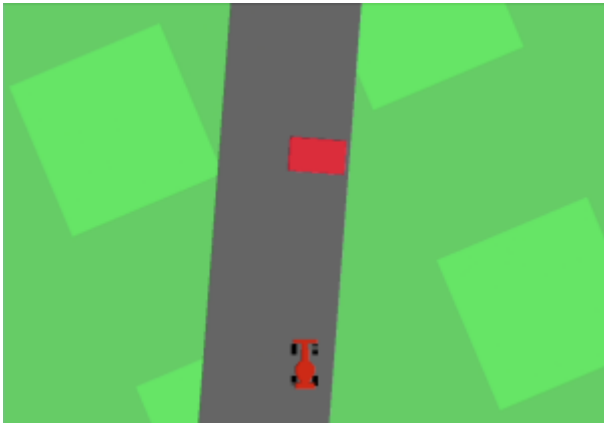

**Step 2:** Recall the explanation of how the car works:

**Explanation:** The car learned to drive very well by practicing for ***millions upon millions of simulations.***

**Step 3:**

|                                             | Strongly Disagree     |                       |                       |                       | Strongly agree        |
|---------------------------------------------|-----------------------|-----------------------|-----------------------|-----------------------|-----------------------|
| The car will drive safely in this situation | <input type="radio"/> |
| I am confident in this prediction           | <input type="radio"/> |

**Question 15**

# Question

**Step 1:** Note the Situation

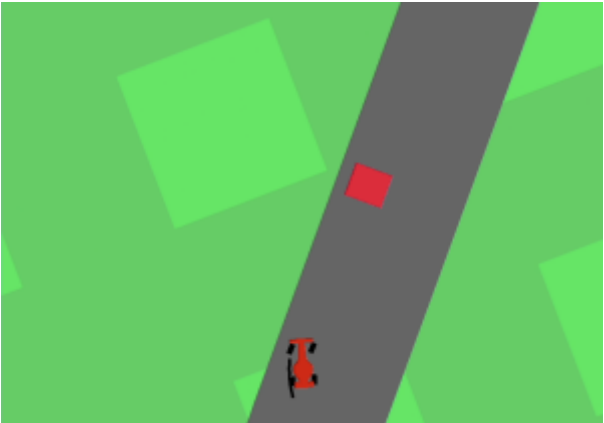

**Step 2:** Recall the explanation of how the car works:

**Explanation:** The car learned to drive very well by practicing for ***millions upon millions of simulations.***

**Step 3:**

|                                             | Strongly Disagree     |                       |                       |                       | Strongly agree        |
|---------------------------------------------|-----------------------|-----------------------|-----------------------|-----------------------|-----------------------|
| The car will drive safely in this situation | <input type="radio"/> |

|                                   |                       |                       |                       |                       |                       |                   |
|-----------------------------------|-----------------------|-----------------------|-----------------------|-----------------------|-----------------------|-------------------|
|                                   | Strongly<br>Disagree  |                       |                       |                       |                       | Strongly<br>agree |
| I am confident in this prediction | <input type="radio"/> |                   |

Question 17

Question

Step 1: Note the Situation

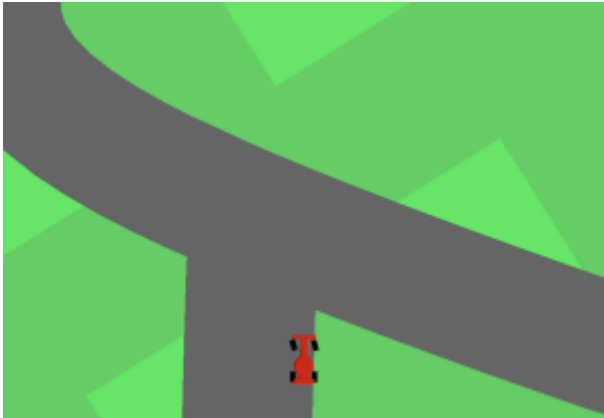

Step 2: Recall the explanation of how the car works:

**Explanation:** The car learned to drive very well by practicing for **millions upon millions of simulations.**

Step 3:

|                                             |                       |                       |                       |                       |                       |                   |
|---------------------------------------------|-----------------------|-----------------------|-----------------------|-----------------------|-----------------------|-------------------|
|                                             | Strongly<br>Disagree  |                       |                       |                       |                       | Strongly<br>agree |
| The car will drive safely in this situation | <input type="radio"/> |                   |
| I am confident in this prediction           | <input type="radio"/> |                   |

Question 19

Question

Step 1: Note the Situation

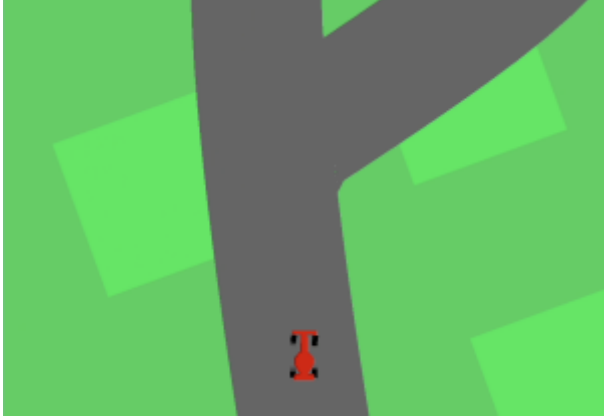

**Step 2:** Recall the explanation of how the car works:

**Explanation:** The car learned to drive very well by practicing for **millions upon millions of simulations**.

**Step 3:**

|                                             | Strongly<br>Disagree  |  |                       |  |                       | Strongly<br>agree     |
|---------------------------------------------|-----------------------|--|-----------------------|--|-----------------------|-----------------------|
| The car will drive safely in this situation | <input type="radio"/> |  | <input type="radio"/> |  | <input type="radio"/> | <input type="radio"/> |
| I am confident in this prediction           | <input type="radio"/> |  | <input type="radio"/> |  | <input type="radio"/> | <input type="radio"/> |

**Attention Check**

# Question

**Step 1:** Note the Situation

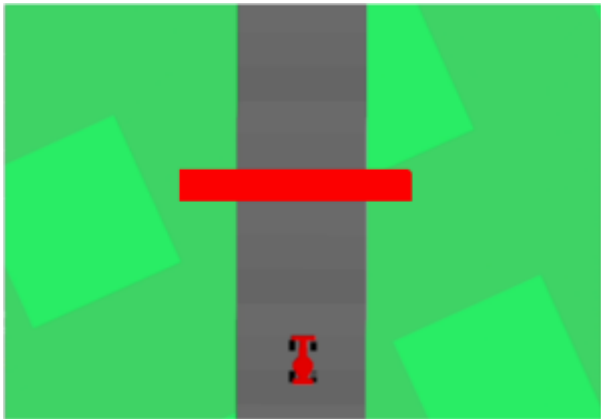



**Step 2:** Recall the explanation of how the car works:

**Explanation:** The car learned to drive very well by practicing for ***millions upon millions of simulations.***

**Step 3:**

|                                             | Strongly Disagree     |                       |                       |                       | Strongly agree        |
|---------------------------------------------|-----------------------|-----------------------|-----------------------|-----------------------|-----------------------|
| The car will drive safely in this situation | <input type="radio"/> |
| I am confident in this prediction           | <input type="radio"/> |

**Question 2**

# Question

**Step 1:** Note the Situation

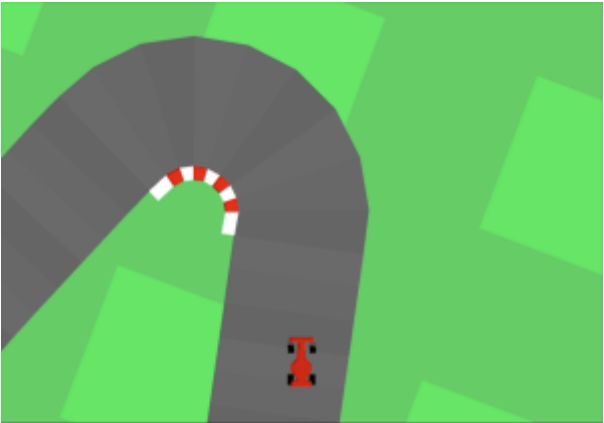

**Step 2:** Recall the explanation of how the car works:

**Explanation:** The car learned to drive very well by practicing for ***millions upon millions of simulations.***

**Step 3:**

|                                             | Strongly Disagree     |                       |                       |                       | Strongly agree        |
|---------------------------------------------|-----------------------|-----------------------|-----------------------|-----------------------|-----------------------|
| The car will drive safely in this situation | <input type="radio"/> |

|                                   |                       |                       |                       |                       |                       |                   |
|-----------------------------------|-----------------------|-----------------------|-----------------------|-----------------------|-----------------------|-------------------|
|                                   | Strongly<br>Disagree  |                       |                       |                       |                       | Strongly<br>agree |
| I am confident in this prediction | <input type="radio"/> |                   |

Question 4

Question

Step 1: Note the Situation

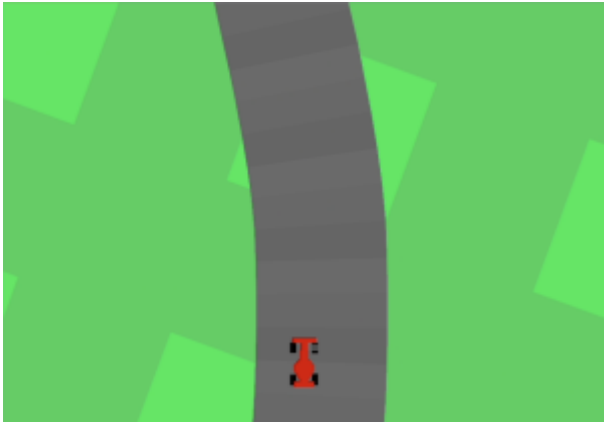

Step 2: Recall the explanation of how the car works:

**Explanation:** The car learned to drive very well by practicing for ***millions upon millions of simulations.***

Step 3:

|                                             |                       |                       |                       |                       |                       |                   |
|---------------------------------------------|-----------------------|-----------------------|-----------------------|-----------------------|-----------------------|-------------------|
|                                             | Strongly<br>Disagree  |                       |                       |                       |                       | Strongly<br>agree |
| The car will drive safely in this situation | <input type="radio"/> |                   |
| I am confident in this prediction           | <input type="radio"/> |                   |

Question 6

Question

Step 1: Note the Situation

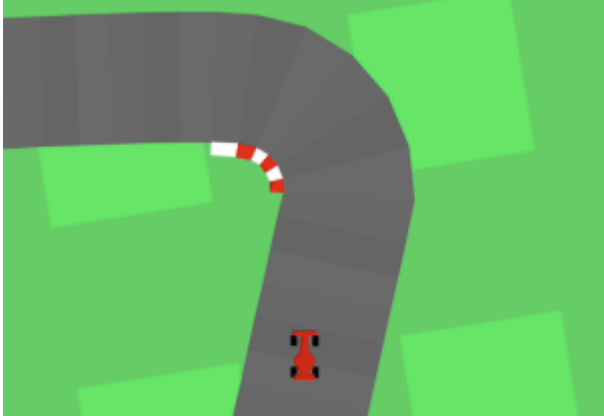

**Step 2:** Recall the explanation of how the car works:

**Explanation:** The car learned to drive very well by practicing for **millions upon millions of simulations**.

**Step 3:**

|                                             | Strongly<br>Disagree  |                       |                       |                       |                       | Strongly<br>agree |
|---------------------------------------------|-----------------------|-----------------------|-----------------------|-----------------------|-----------------------|-------------------|
| The car will drive safely in this situation | <input type="radio"/> |                   |
| I am confident in this prediction           | <input type="radio"/> |                   |

**Question 8**

# Question

**Step 1:** Note the Situation

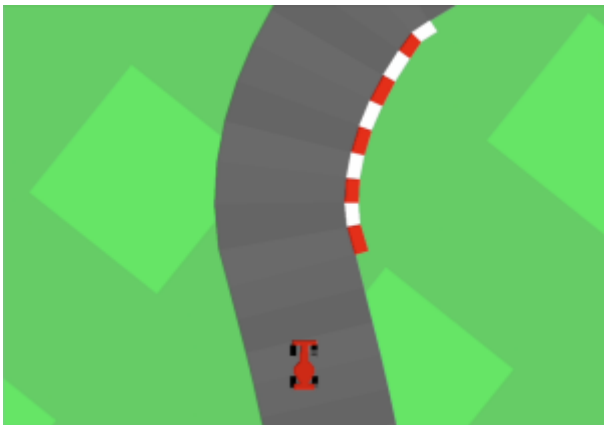

**Step 2:** Recall the explanation of how the car works:

**Explanation:** The car learned to drive very well by practicing for ***millions upon millions of simulations***.

**Step 3:**

|                                             | Strongly Disagree     |                       |                       |                       | Strongly agree        |
|---------------------------------------------|-----------------------|-----------------------|-----------------------|-----------------------|-----------------------|
| The car will drive safely in this situation | <input type="radio"/> |
| I am confident in this prediction           | <input type="radio"/> |

**Question 10**

# Question

**Step 1:** Note the Situation

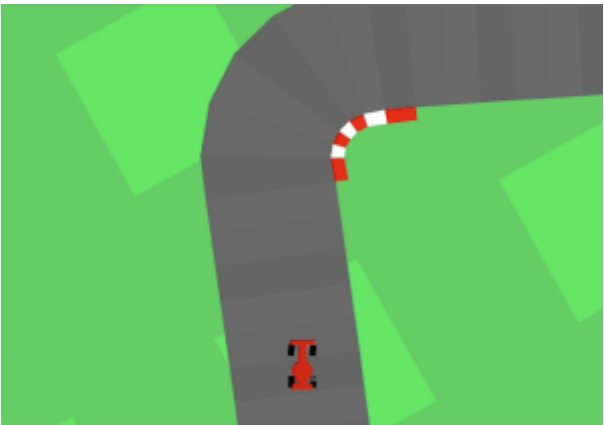

**Step 2:** Recall the explanation of how the car works:

**Explanation:** The car learned to drive very well by practicing for ***millions upon millions of simulations***.

**Step 3:**

|                                             | Strongly Disagree     |                       |                       |                       | Strongly agree        |
|---------------------------------------------|-----------------------|-----------------------|-----------------------|-----------------------|-----------------------|
| The car will drive safely in this situation | <input type="radio"/> |

|                                   |                       |                       |                       |                       |                       |                |
|-----------------------------------|-----------------------|-----------------------|-----------------------|-----------------------|-----------------------|----------------|
|                                   | Strongly Disagree     |                       |                       |                       |                       | Strongly agree |
| I am confident in this prediction | <input type="radio"/> |                |

Question 12

Question

Step 1: Note the Situation

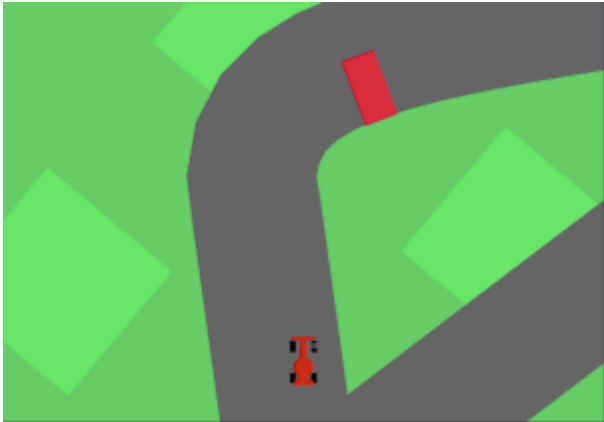

Step 2: Recall the explanation of how the car works:

**Explanation:** The car learned to drive very well by practicing for ***millions upon millions of simulations.***

Step 3:

|                                             |                       |                       |                       |                       |                       |                |
|---------------------------------------------|-----------------------|-----------------------|-----------------------|-----------------------|-----------------------|----------------|
|                                             | Strongly Disagree     |                       |                       |                       |                       | Strongly agree |
| The car will drive safely in this situation | <input type="radio"/> |                |
| I am confident in this prediction           | <input type="radio"/> |                |

Question 14

Question

Step 1: Note the Situation

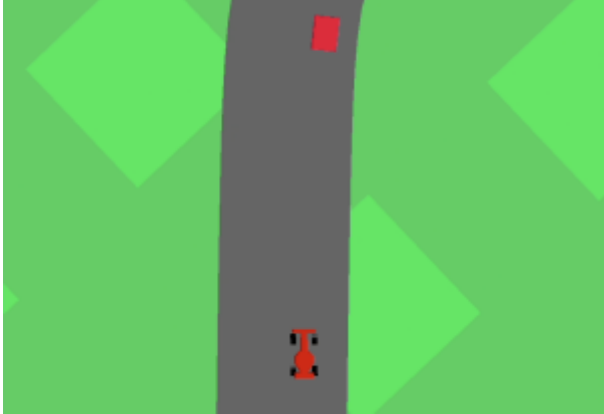

**Step 2:** Recall the explanation of how the car works:

**Explanation:** The car learned to drive very well by practicing for millions upon millions of simulations.

**Step 3:**

|                                                | Strongly<br>Disagree  |                       |                       |                       | Strongly<br>agree     |
|------------------------------------------------|-----------------------|-----------------------|-----------------------|-----------------------|-----------------------|
| The car will drive safely<br>in this situation | <input type="radio"/> |
| I am confident in this<br>prediction           | <input type="radio"/> |

**Question 16**

# Question

**Step 1:** Note the Situation

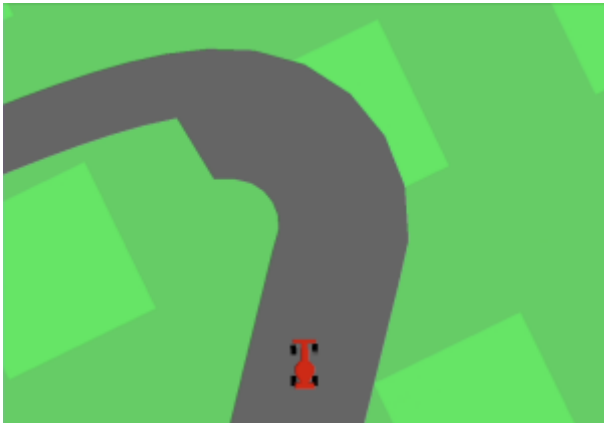

**Step 2:** Recall the explanation of how the car works:

**Explanation:** The car learned to drive very well by practicing for ***millions upon millions of simulations.***

**Step 3:**

|                                             | Strongly Disagree     |                       |                       |                       | Strongly agree        |
|---------------------------------------------|-----------------------|-----------------------|-----------------------|-----------------------|-----------------------|
| The car will drive safely in this situation | <input type="radio"/> |
| I am confident in this prediction           | <input type="radio"/> |

**Question 18**

# Question

**Step 1:** Note the Situation

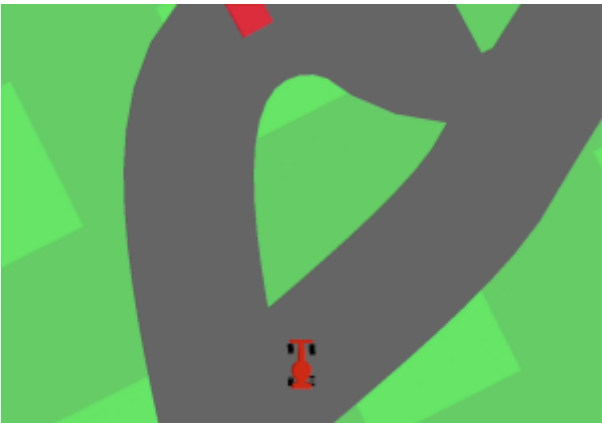

**Step 2:** Recall the explanation of how the car works:

**Explanation:** The car learned to drive very well by practicing for ***millions upon millions of simulations.***

**Step 3:**

|                                             | Strongly Disagree     |                       |                       |                       | Strongly agree        |
|---------------------------------------------|-----------------------|-----------------------|-----------------------|-----------------------|-----------------------|
| The car will drive safely in this situation | <input type="radio"/> |

|                                   | Strongly Disagree     |                       |                       |                       | Strongly agree        |
|-----------------------------------|-----------------------|-----------------------|-----------------------|-----------------------|-----------------------|
| I am confident in this prediction | <input type="radio"/> |

Question 20

Question

Step 1: Note the Situation

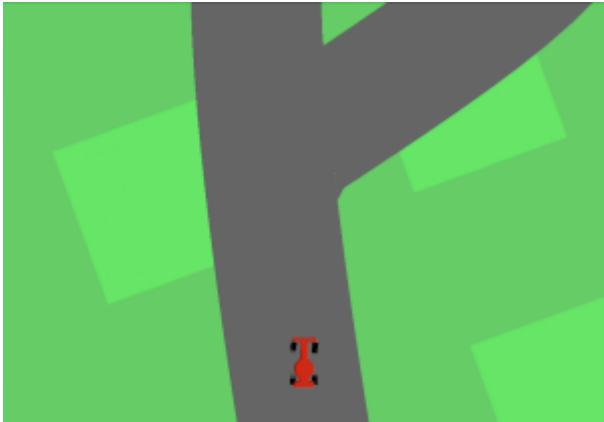

Step 2: Recall the explanation of how the car works:

**Explanation:** The car learned to drive very well by practicing for ***millions upon millions of simulations.***

Step 3:

|                                             | Strongly Disagree     |                       |                       |                       | Strongly agree        |
|---------------------------------------------|-----------------------|-----------------------|-----------------------|-----------------------|-----------------------|
| The car will drive safely in this situation | <input type="radio"/> |
| I am confident in this prediction           | <input type="radio"/> |

Title safe situations

Thank You For Your Participation!

You Will Now Be Shown Where the Car Drove Safely



Safe situations

# The Car Drove *Safely* In These Situations

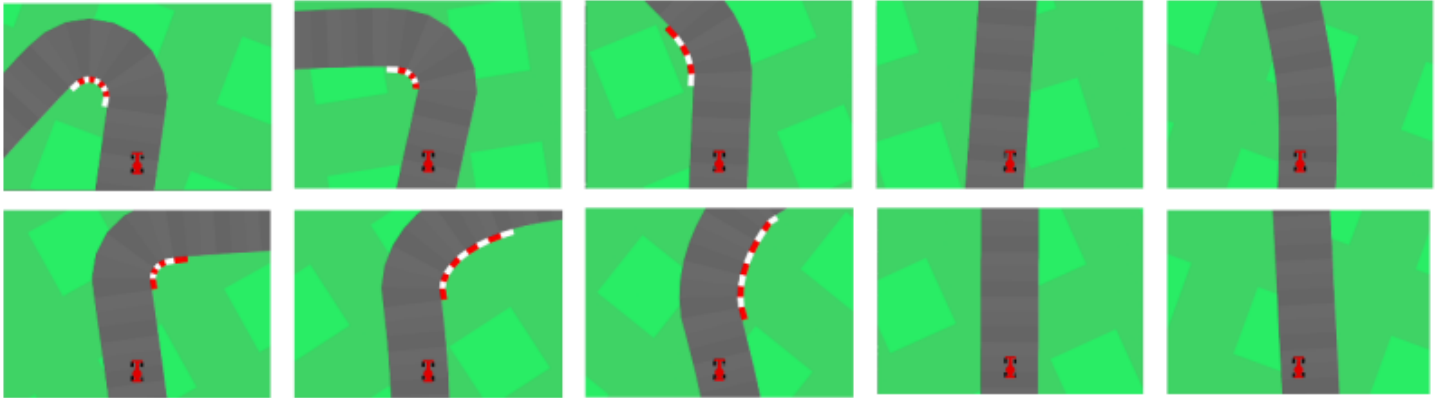

Title crash situations

Click Next To See The Situations  
The Car Crashed

Crash situations

The Car Did Not Drive Safely In These  
Situations

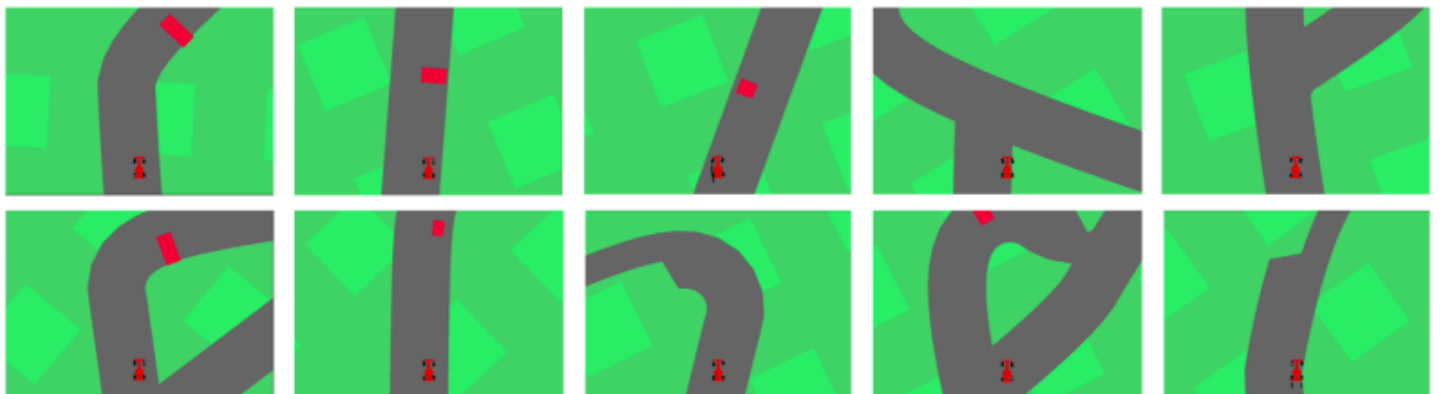

Please... fill out... 2 surverys... to finish

# Next, Please Fill Out Two Short Questionnaires

## SUS Questions

Questionnaire 1: The "System" in these questions is referring to the **car** and **explanation**.

|                                                                                            | Strongly Disagree     | Somewhat disagree     | Neither agree nor disagree | Somewhat agree        | Strongly agree        |
|--------------------------------------------------------------------------------------------|-----------------------|-----------------------|----------------------------|-----------------------|-----------------------|
| I think that I would like to use this system frequently.                                   | <input type="radio"/> | <input type="radio"/> | <input type="radio"/>      | <input type="radio"/> | <input type="radio"/> |
| I found the system unnecessarily complex.                                                  | <input type="radio"/> | <input type="radio"/> | <input type="radio"/>      | <input type="radio"/> | <input type="radio"/> |
| I thought the system was easy to use.                                                      | <input type="radio"/> | <input type="radio"/> | <input type="radio"/>      | <input type="radio"/> | <input type="radio"/> |
| I think that I would need the support of a technical person to be able to use this system. | <input type="radio"/> | <input type="radio"/> | <input type="radio"/>      | <input type="radio"/> | <input type="radio"/> |
| I found the various functions in this system were well integrated.                         | <input type="radio"/> | <input type="radio"/> | <input type="radio"/>      | <input type="radio"/> | <input type="radio"/> |
| I thought there was too much inconsistency in the system.                                  | <input type="radio"/> | <input type="radio"/> | <input type="radio"/>      | <input type="radio"/> | <input type="radio"/> |
| I would imagine that most people would learn to use this system very quickly               | <input type="radio"/> | <input type="radio"/> | <input type="radio"/>      | <input type="radio"/> | <input type="radio"/> |
| I found the system very cumbersome to use.                                                 | <input type="radio"/> | <input type="radio"/> | <input type="radio"/>      | <input type="radio"/> | <input type="radio"/> |
| I felt very confident using the system.                                                    | <input type="radio"/> | <input type="radio"/> | <input type="radio"/>      | <input type="radio"/> | <input type="radio"/> |
| I needed to learn a lot of things before I could get going with this system.               | <input type="radio"/> | <input type="radio"/> | <input type="radio"/>      | <input type="radio"/> | <input type="radio"/> |

## NASA Questions

Questionnaire 2

Low High  
0 1 2 3 4 5 6 7 8 9 10 11 12 13 14 15 16 17 18 19 20

How mentally  
demanding was the  
task?

How physically  
demanding was the  
task?

How hurried or  
rushed was the pace  
of the task?

How successful  
were you in  
accomplishing what  
you were asked to  
do?

How hard did ou  
have to work to  
accomplish your  
level of  
performance?

How insecure,  
discouraged,  
irritated, stressed,  
and annoyed were  
you?

Block 52

To finish the survey, can you please explain, in your own words, with as much detail as possible, why you think the car crashed sometimes?

Block 42

Debrief Page

Thank you for your participation, this study was designed to evaluate people’s ability to
