# Supplementary material
Source: ML conference proceedings conference paper supplement (https://openreview.net/forum?id=hWwY_Jq0xsN)
Supplement: supplementary_material [file attachment]

## Briefing

**Do not take this study on a mobile phone**, the text and images won't display correctly.

**Do not take this study** if you have done a similar one recently.

You are free to leave at any time.

The study will take around 12mins.

You will be paid \$12 per hour for your efforts.

Thank you for your participation!

## Block 53

Please Enter Your Prolific ID Here

## Introduction 1

# Introduction

A computer program has learned to drive a car using **four human-defined concepts**.

The four concepts are:

1. Accelerate
2. Brake
3. Turn Left
4. Turn Right

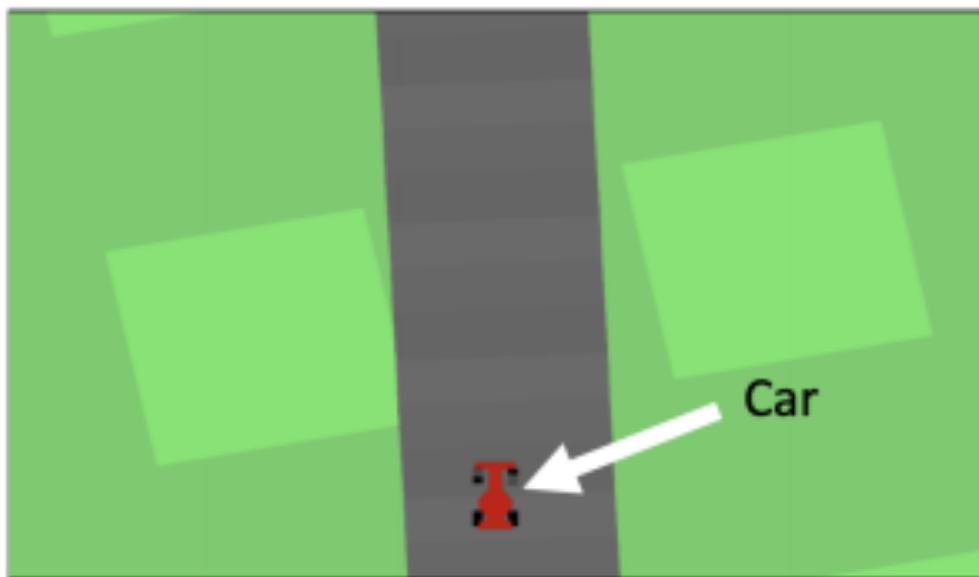

**Important:** In all images you see, the car is constantly moving forward.

## Introduction 2

# Introduction

To explain what the car understands by these four concepts, it visualizes them for people using these four images. **Please study them now very carefully** to see if they make sense to you, and if you think the car has learned the concepts correctly.

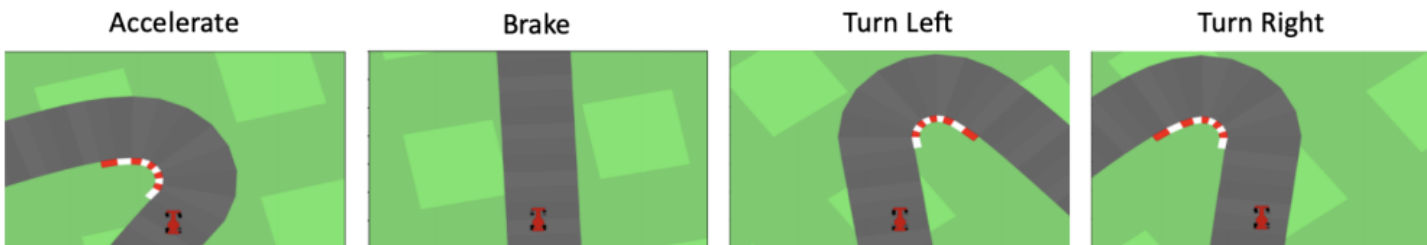

## Introduction acc

# Introduction

So, the car will take the action **ACCELERATE** in situations it thinks are similar to this.

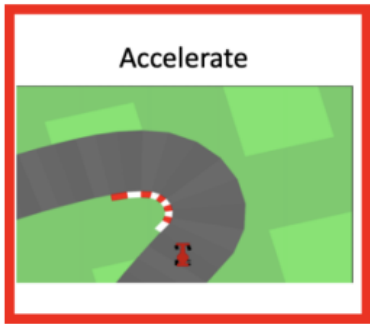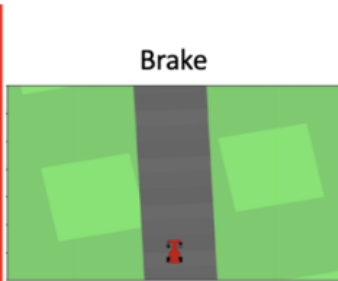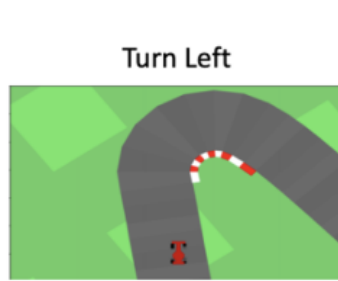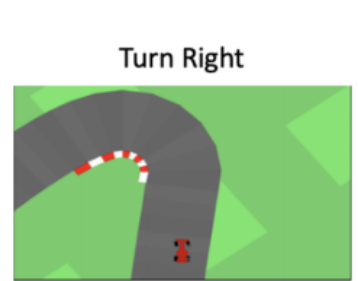

Introduction brake

# Introduction

The car will take the action **BRAKE** in situations it thinks are similar to this.

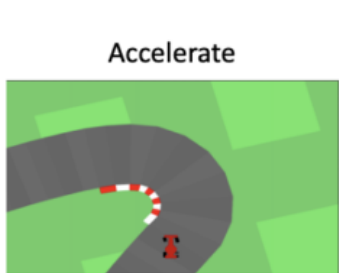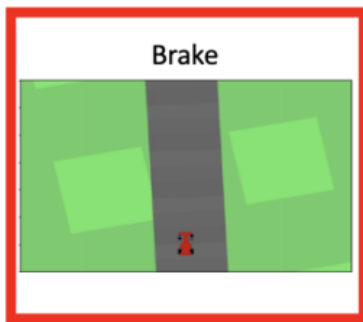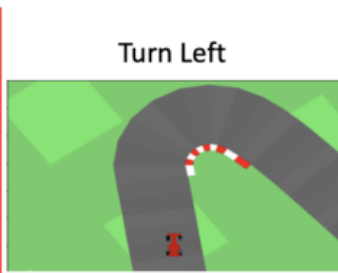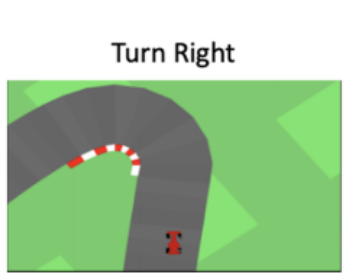

Introduction left

# Introduction

The car will take the action **TURN LEFT** in situations it thinks are similar to this.

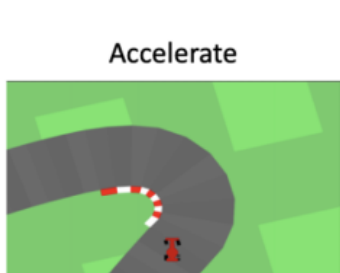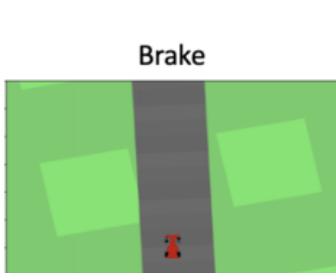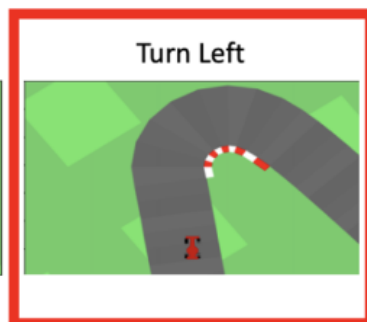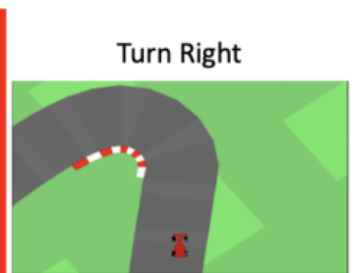

Introduction Right

# Introduction

The car will take the action **TURN RIGHT** in situations it thinks are similar to this.

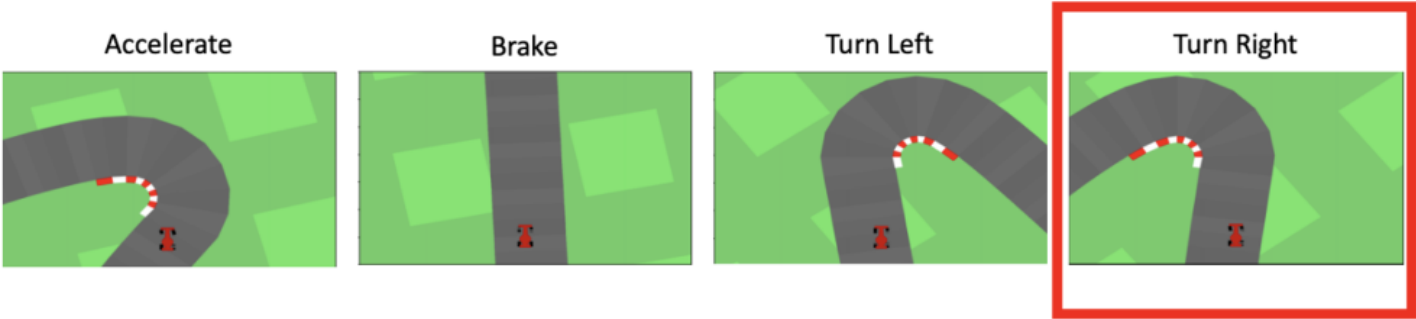

Introduction combine

# Introduction

Lastly, the car can combine concepts, and will **TURN RIGHT** and **ACCELERATE** *at the same time* in situations that it thinks are similar to *both* of these.

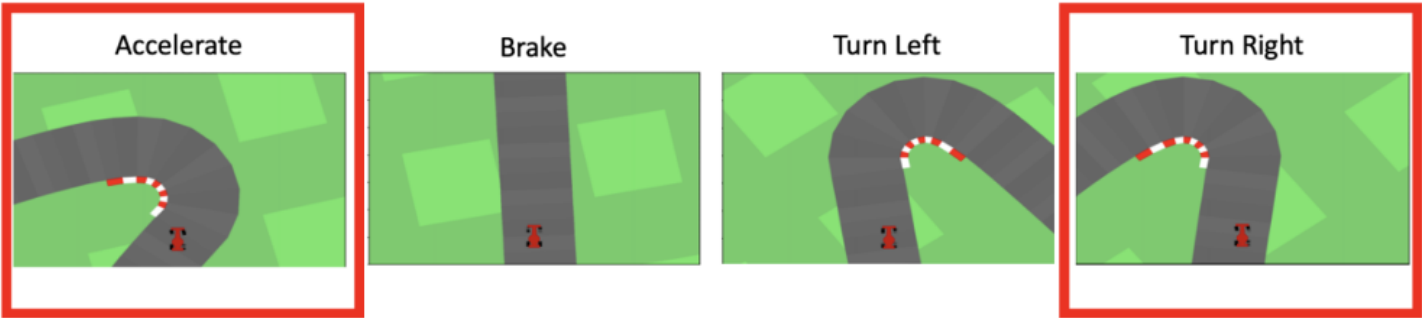

Example 2

# Example

So, for example, here the situation is *visually similar* to the concept "Turn Left".

So the car is likely going to turn left and drive off the road crashing!!!

## Situation

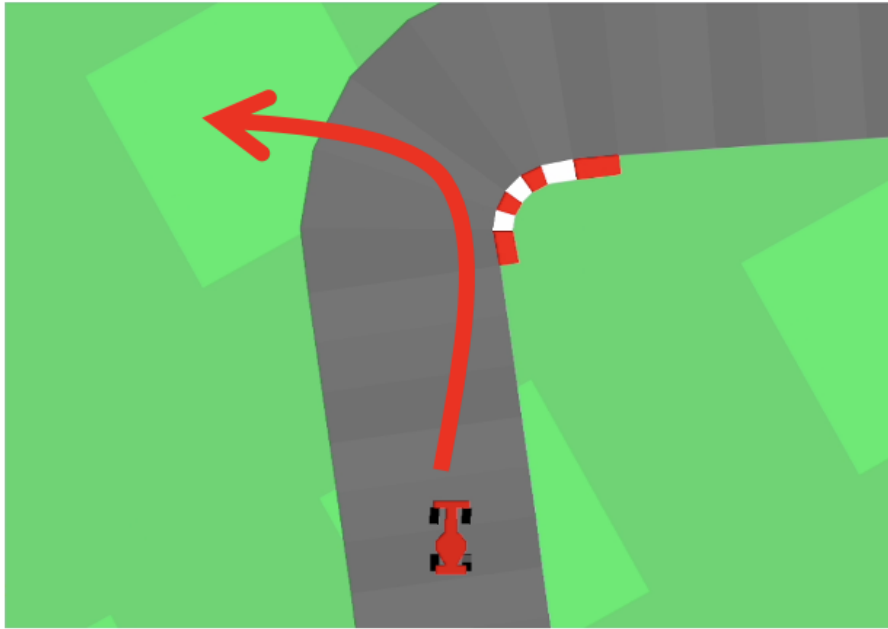

## Concepts

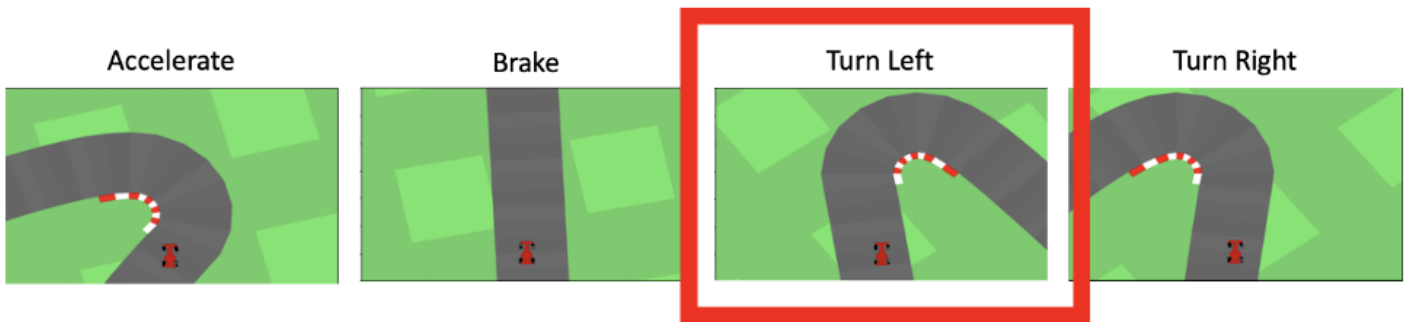

### Example 3

## Example

As another example, here the situation is visually similar to the concepts "Accelerate" and "Turn Right".

So the car is likely going to turn right, accelerate, and again drive off the road crashing!!!

## Situation

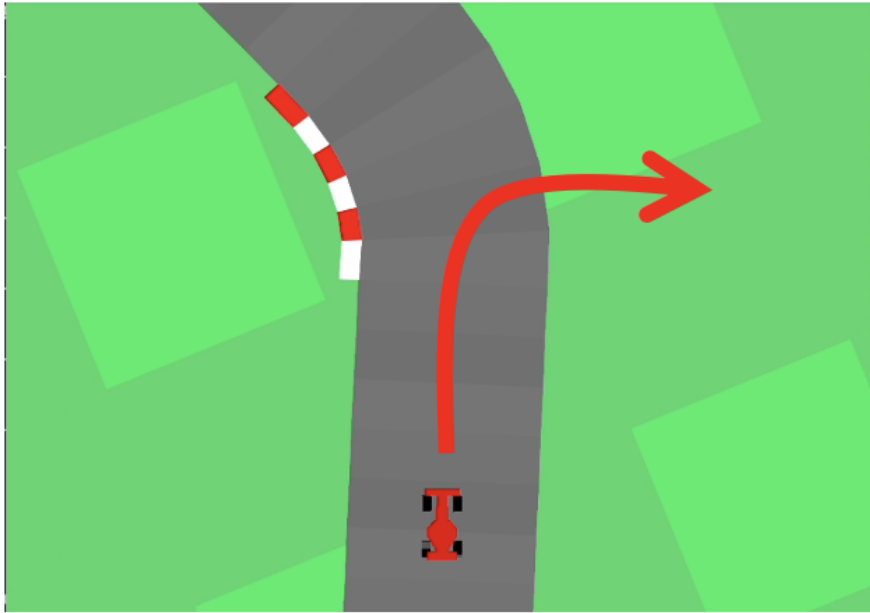

## Concepts

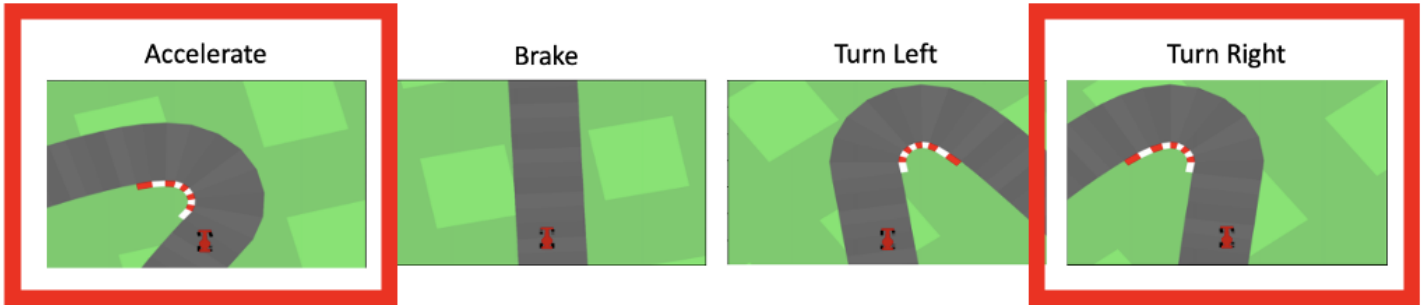

Example 4

## Example

Lastly, here the situation is visually similar to the concept "**Brake**".

So the car is likely going to *brake!!!*

## Situation

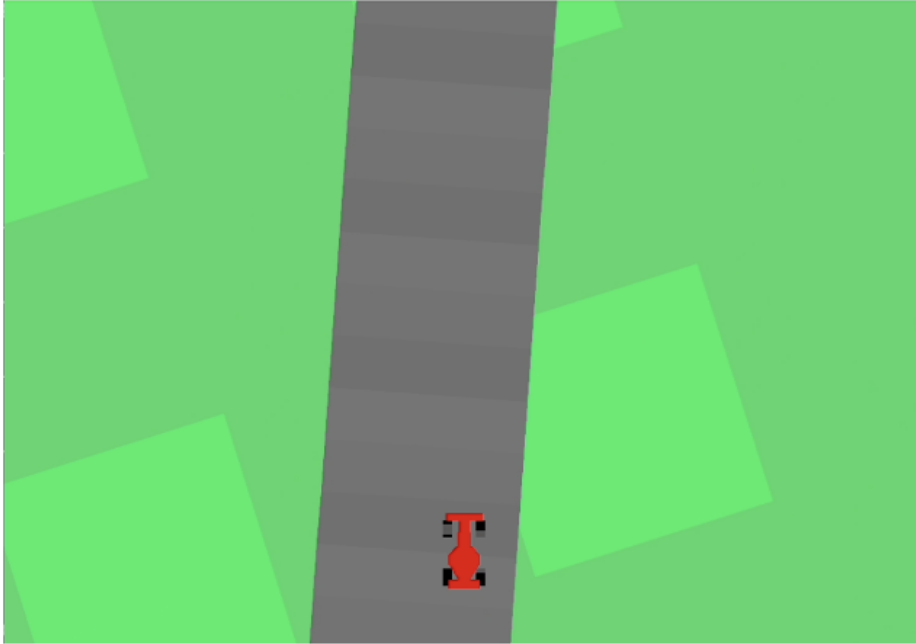

## Concepts

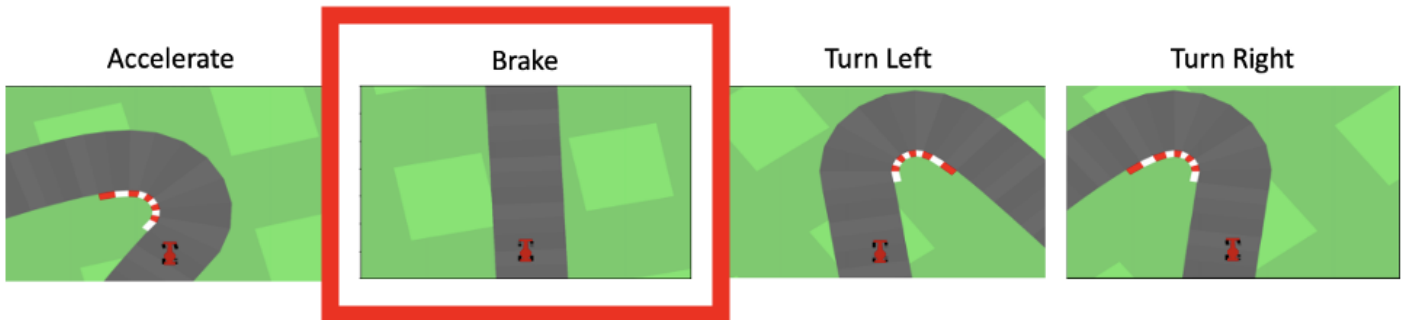

Block 51

# Introduction

It is up to you to look at the current situation, and guess *what actions* the car is going to take.

Your Task

# Your Task!

However, even if the car has learned to drive well, it cannot drive safely when it encounters situations which are EXTREMELY different to the concepts it has learned.

It is up to you to decide if this is happening.

So, there are two main things you want to consider when predicting if the car will crash:

1. Are the actions the car is going to take safe in the situation?
2. Is the current situation too different to the car's learned concepts that the car has no idea what to do?

Title

# Press Next For The Task Instructions

Instructions 1

## Instructions

Initially, note the car's situation and the road ahead it must try to navigate safely.

**Step 1:** Note the Situation

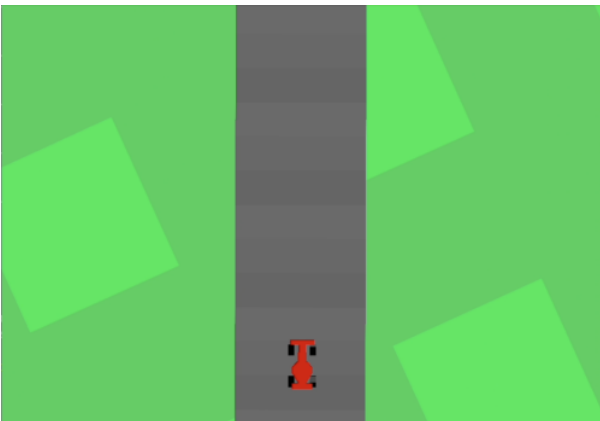

Instructions 2



# Instructions

Secondly, recall the learned concepts (these will NEVER change).

**Step 2:** Recall the car’s learned concepts

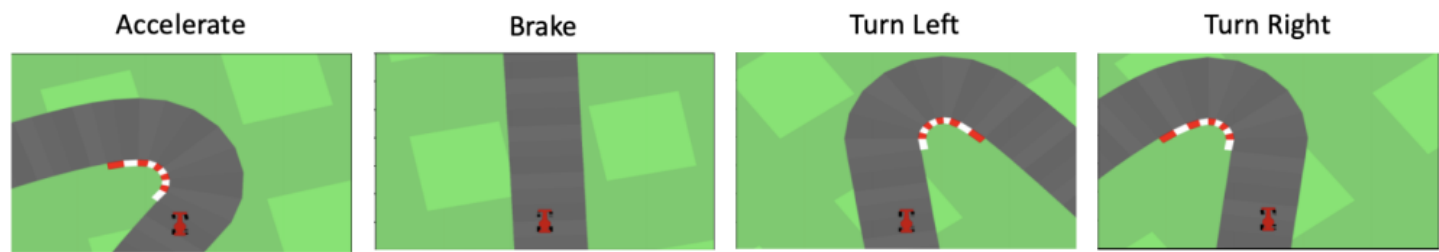

## Instructions 3

# Instructions

Lastly, *predict if the car will drive safely* through the road ahead, *and your confidence* in this prediction.

There are **five options** ranging from "**Strongly Disagree**" to "**Strongly Agree**".

**Step 3:**

|                                             | Strongly Disagree     |                       |                       |                       | Strongly agree        |
|---------------------------------------------|-----------------------|-----------------------|-----------------------|-----------------------|-----------------------|
| The car will drive safely in this situation | <input type="radio"/> |
| I am confident in this prediction           | <input type="radio"/> |

## Red Obstacles

# Red Obstacles

Lastly, there are red obstacles scattered throughout the roads

If the car crashes into these it will *not drive safely*.

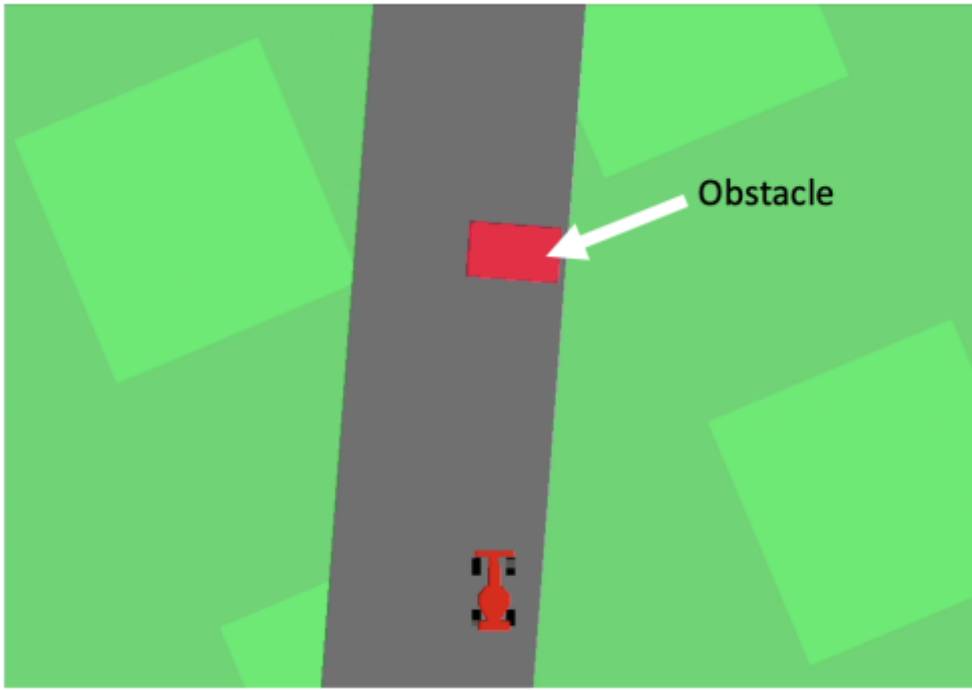

Block 51

Remember, you are trying to predict what the computer program is going to do here while driving the car.

You are NOT trying to convey how you would personally drive.

Sample question title

## Sample Question

Now, please practice on the next question.

Practice Question

## Practice Question

Step 1: Note the Situation

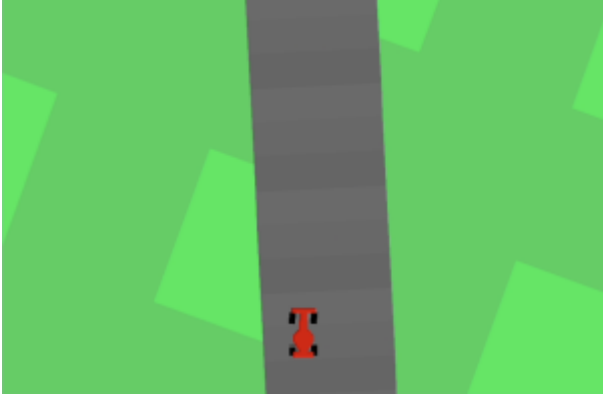

Step 2: Recall the car's learned concepts

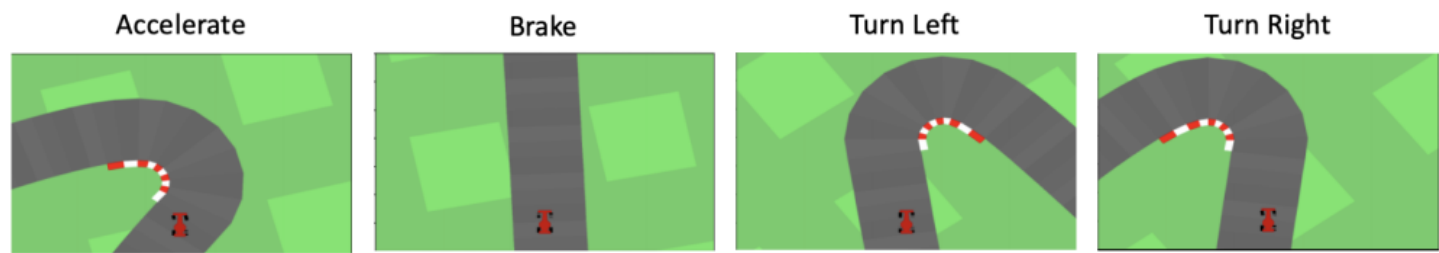

Step 3:

|                                             | Strongly Disagree     |                       |                       |                       | Strongly agree        |
|---------------------------------------------|-----------------------|-----------------------|-----------------------|-----------------------|-----------------------|
| The car will drive safely in this situation | <input type="radio"/> |
| I am confident in this prediction           | <input type="radio"/> |

Please... consider answers... carefully

**Please only participate in this study if you understand the instructions and are willing to consider your answers carefully.**

Click to begin study

**Click Next To Begin The Study**

Question 1

**Question**

Step 1: Note the Situation

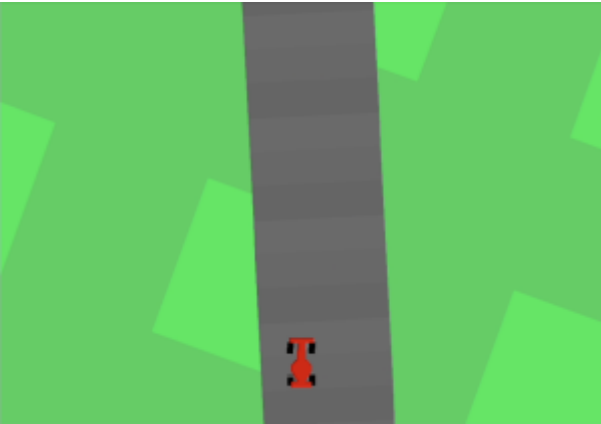

Step 2: Recall the car's learned concepts

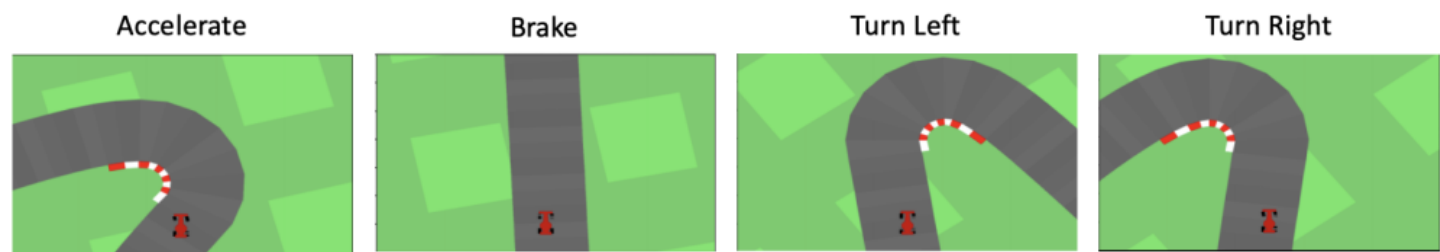

Step 3:

|                                             | Strongly Disagree     |                       |                       |                       | Strongly agree        |
|---------------------------------------------|-----------------------|-----------------------|-----------------------|-----------------------|-----------------------|
| The car will drive safely in this situation | <input type="radio"/> |
| I am confident in this prediction           | <input type="radio"/> |

Question 3

Question

Step 1: Note the Situation

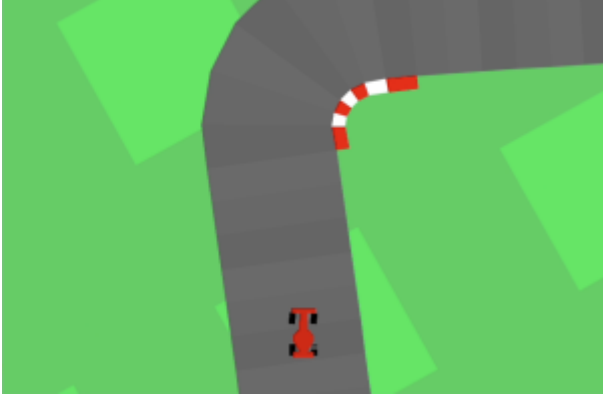

**Step 2:** Recall the car's learned concepts

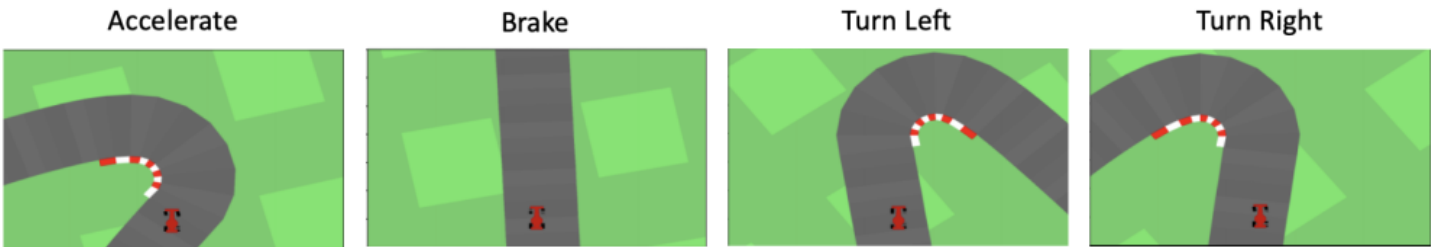

**Step 3:**

|                                             | Strongly Disagree     |                       |                       |                       | Strongly agree        |
|---------------------------------------------|-----------------------|-----------------------|-----------------------|-----------------------|-----------------------|
| The car will drive safely in this situation | <input type="radio"/> |
| I am confident in this prediction           | <input type="radio"/> |

**Question 5**

# Question

**Step 1:** Note the Situation

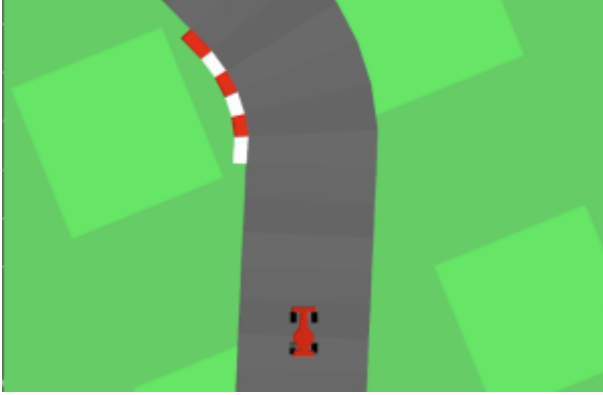

Step 2: Recall the car's learned concepts

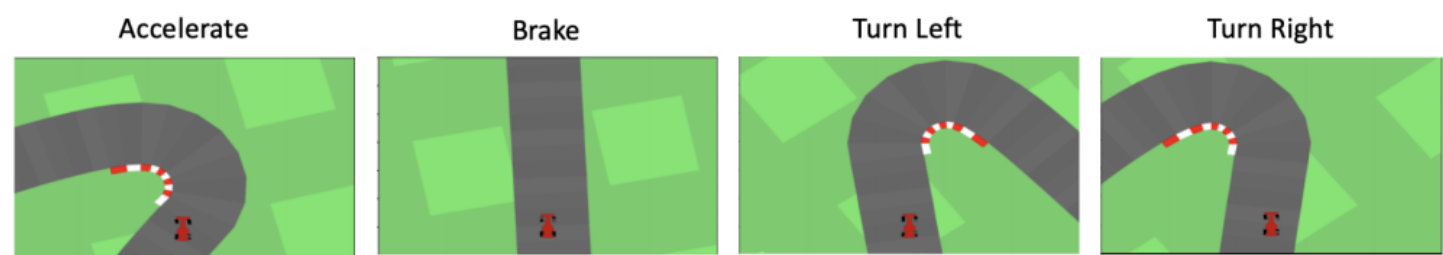

Step 3:

|                                             | Strongly Disagree     |                       |                       |                       | Strongly agree        |
|---------------------------------------------|-----------------------|-----------------------|-----------------------|-----------------------|-----------------------|
| The car will drive safely in this situation | <input type="radio"/> |
| I am confident in this prediction           | <input type="radio"/> |

Question 7

# Question

Step 1: Note the Situation

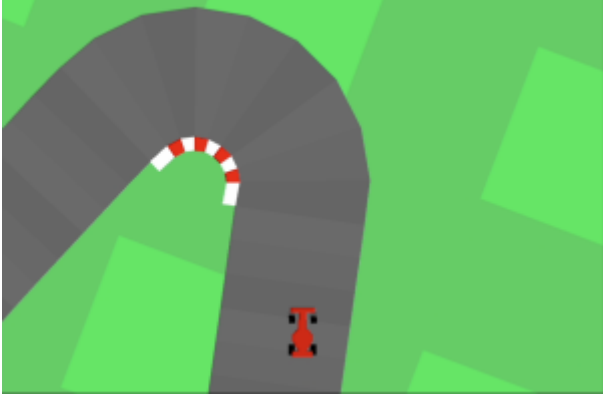

Step 2: Recall the car's learned concepts

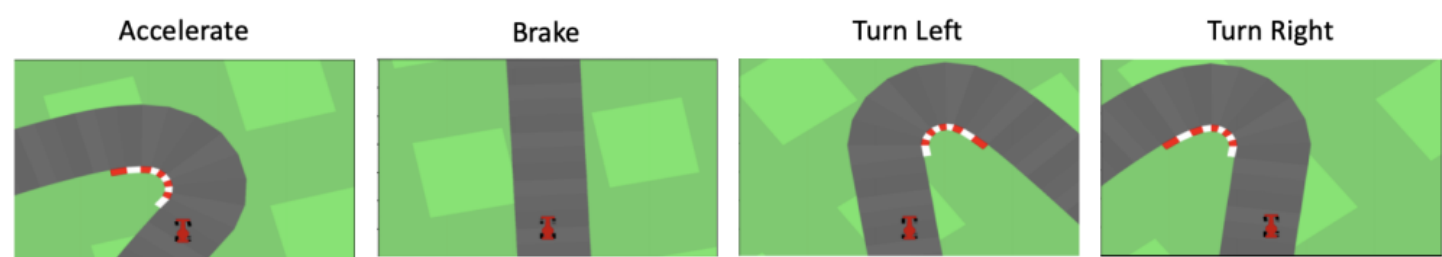

Step 3:

|                                             | Strongly Disagree     |                       |                       |                       | Strongly agree        |
|---------------------------------------------|-----------------------|-----------------------|-----------------------|-----------------------|-----------------------|
| The car will drive safely in this situation | <input type="radio"/> |
| I am confident in this prediction           | <input type="radio"/> |

Question 9

# Question

Step 1: Note the Situation

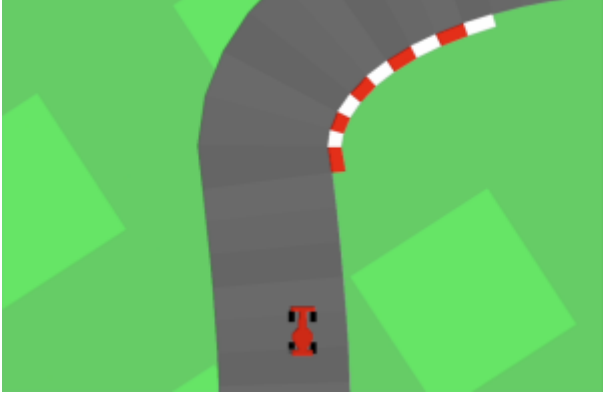

Step 2: Recall the car's learned concepts



Step 3:

|                                             | Strongly Disagree     |                       |                       |                       | Strongly agree        |
|---------------------------------------------|-----------------------|-----------------------|-----------------------|-----------------------|-----------------------|
| The car will drive safely in this situation | <input type="radio"/> |
| I am confident in this prediction           | <input type="radio"/> |

Question 11

# Question

Step 1: Note the Situation



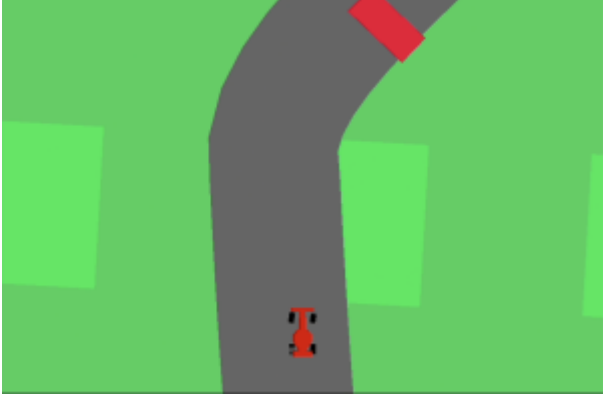

Step 2: Recall the car's learned concepts

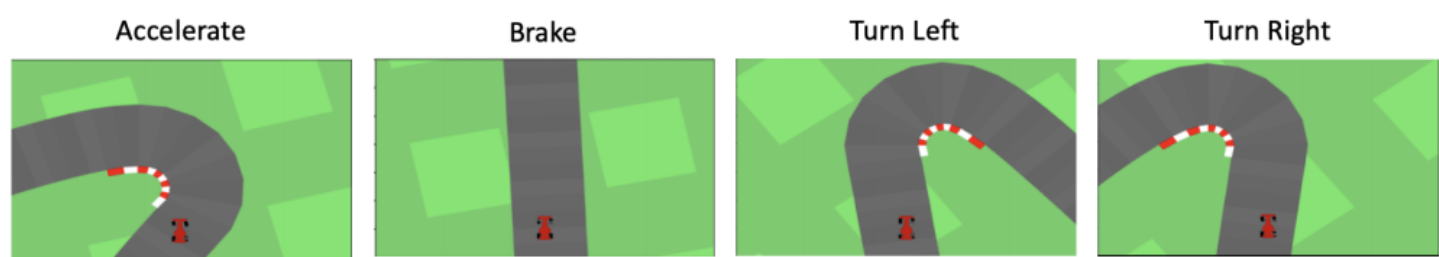

Step 3:

|                                             | Strongly Disagree     |                       |                       |                       | Strongly agree        |
|---------------------------------------------|-----------------------|-----------------------|-----------------------|-----------------------|-----------------------|
| The car will drive safely in this situation | <input type="radio"/> |
| I am confident in this prediction           | <input type="radio"/> |

Question 13

# Question

Step 1: Note the Situation

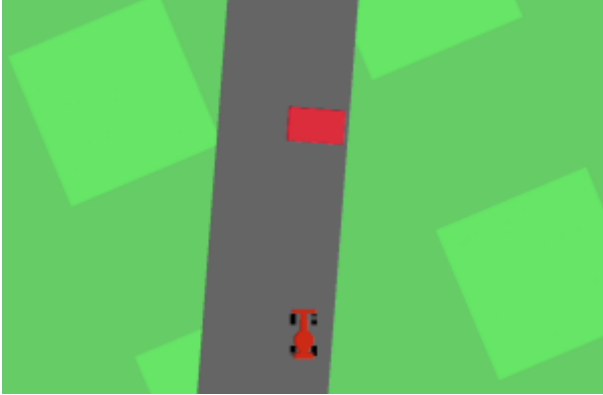

Step 2: Recall the car's learned concepts

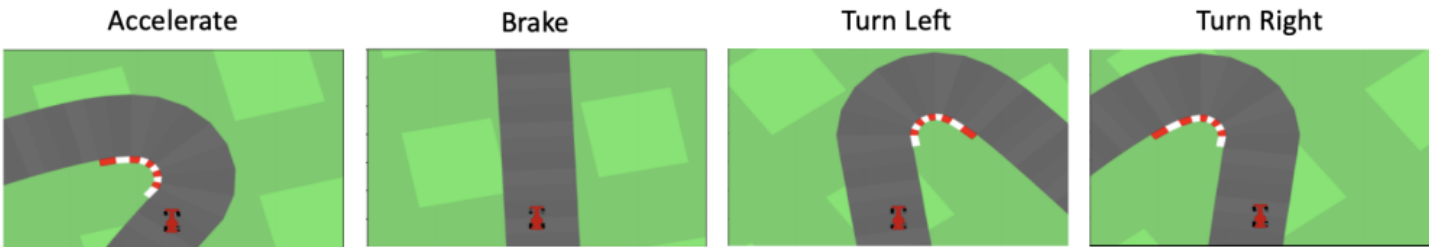

Step 3:

|                                             | Strongly Disagree     |                       |                       |                       | Strongly agree        |
|---------------------------------------------|-----------------------|-----------------------|-----------------------|-----------------------|-----------------------|
| The car will drive safely in this situation | <input type="radio"/> |
| I am confident in this prediction           | <input type="radio"/> |

Question 15

# Question

Step 1: Note the Situation

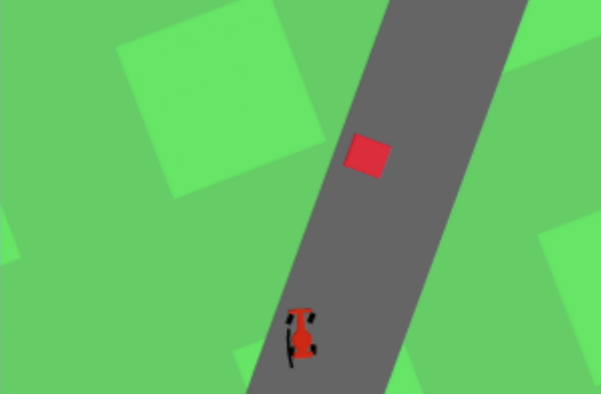

Step 2: Recall the car's learned concepts

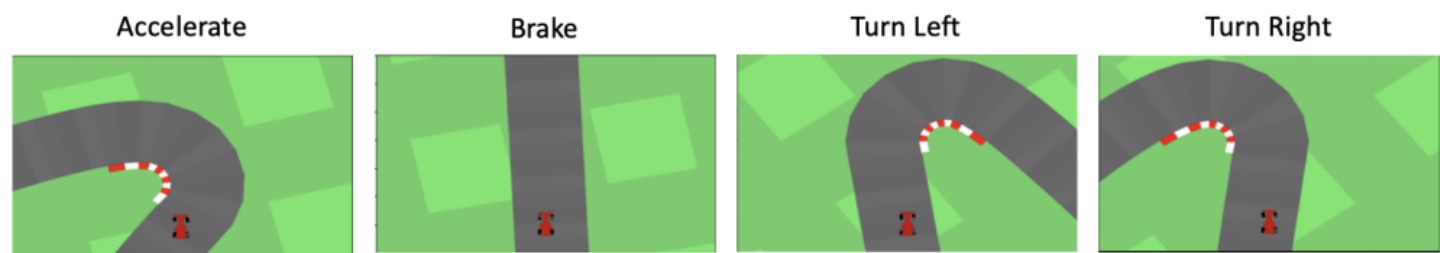

Step 3:

|                                             | Strongly Disagree     |                       |                       |                       | Strongly agree        |
|---------------------------------------------|-----------------------|-----------------------|-----------------------|-----------------------|-----------------------|
| The car will drive safely in this situation | <input type="radio"/> |
| I am confident in this prediction           | <input type="radio"/> |

Question 17

# Question

Step 1: Note the Situation

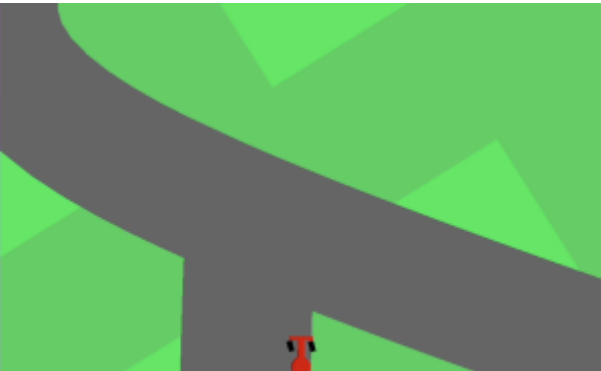

**Step 2:** Recall the car's learned concepts

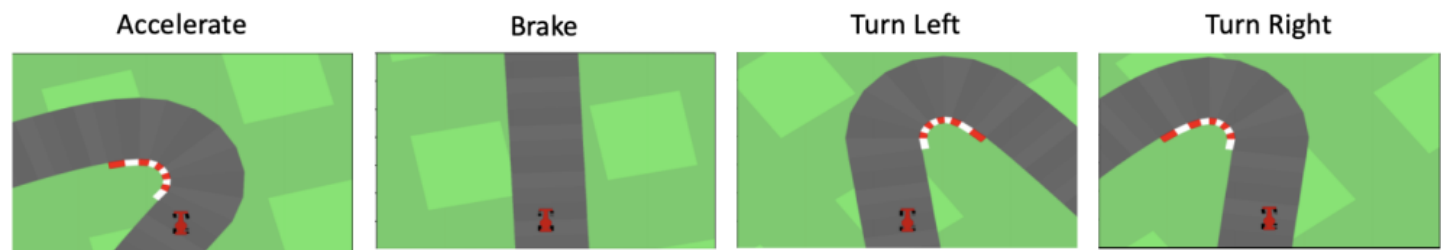

**Step 3:**

|                                             | Strongly Disagree     |                       |                       |                       | Strongly agree        |
|---------------------------------------------|-----------------------|-----------------------|-----------------------|-----------------------|-----------------------|
| The car will drive safely in this situation | <input type="radio"/> |
| I am confident in this prediction           | <input type="radio"/> |

**Question 19**

# Question

**Step 1:** Note the Situation

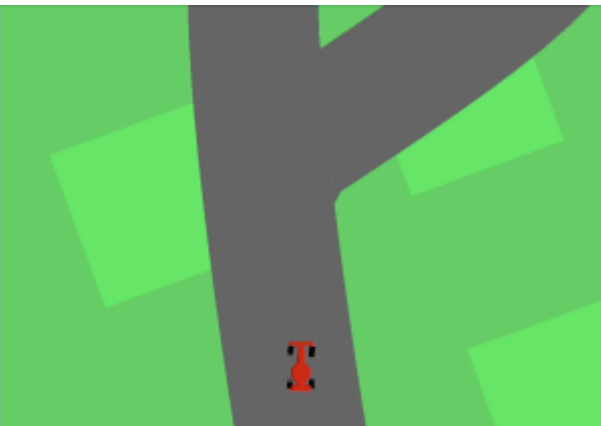

**Step 2:** Recall the car's learned concepts

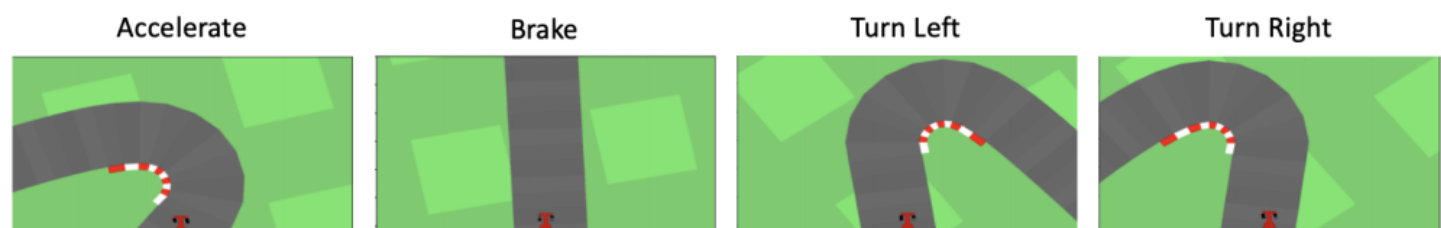

Step 3:

|                                             | Strongly Disagree     |                       |                       |                       | Strongly agree        |
|---------------------------------------------|-----------------------|-----------------------|-----------------------|-----------------------|-----------------------|
| The car will drive safely in this situation | <input type="radio"/> |
| I am confident in this prediction           | <input type="radio"/> |

Attention Check

Question

Step 1: Note the Situation

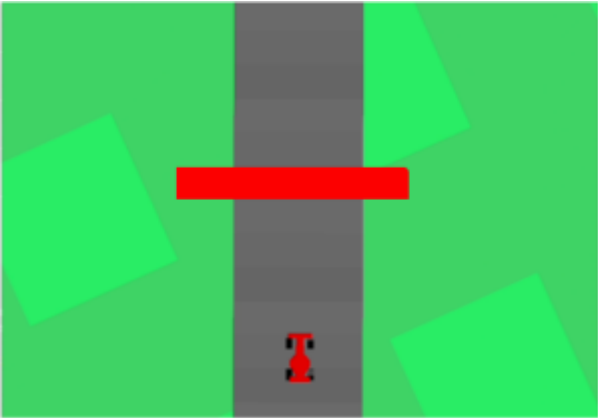

Step 2: Recall the car's learned concepts

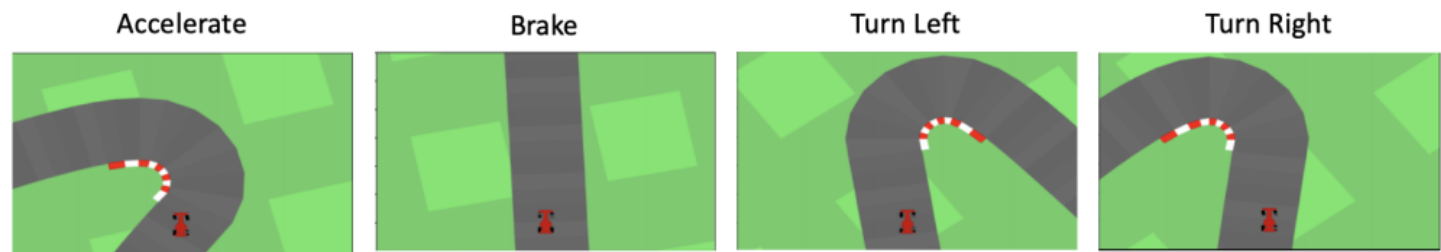

Step 3:

|                                             | Strongly Disagree     |                       |                       |                       | Strongly agree        |
|---------------------------------------------|-----------------------|-----------------------|-----------------------|-----------------------|-----------------------|
| The car will drive safely in this situation | <input type="radio"/> |
| I am confident in this prediction           | <input type="radio"/> |

# Question

Step 1: Note the Situation

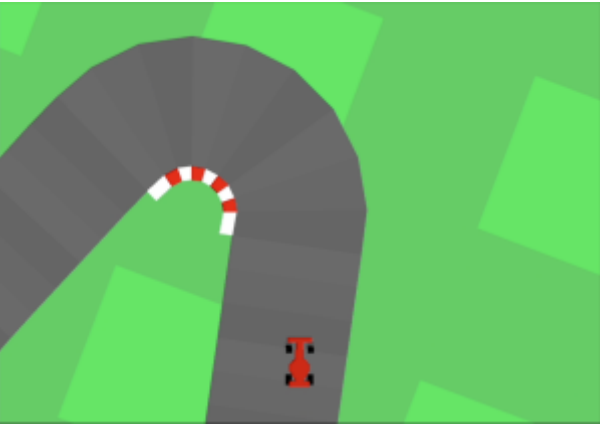

Step 2: Recall the car's learned concepts

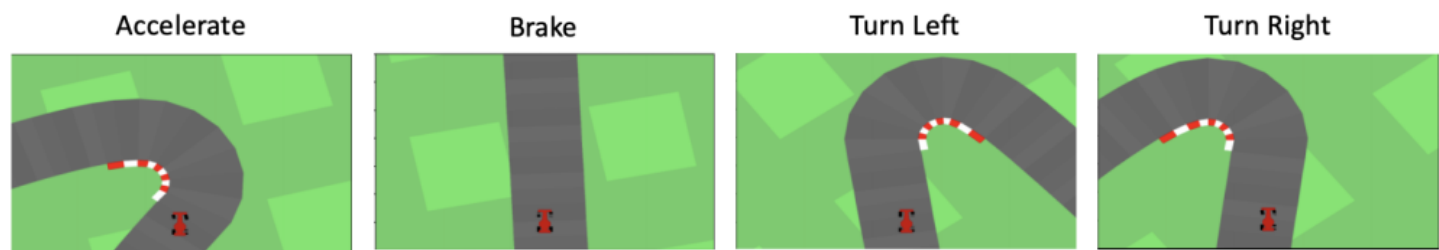

Step 3:

|                                             | Strongly Disagree     |                       |                       |                       | Strongly agree        |
|---------------------------------------------|-----------------------|-----------------------|-----------------------|-----------------------|-----------------------|
| The car will drive safely in this situation | <input type="radio"/> |
| I am confident in this prediction           | <input type="radio"/> |

## Question 4

# Question

Step 1: Note the Situation

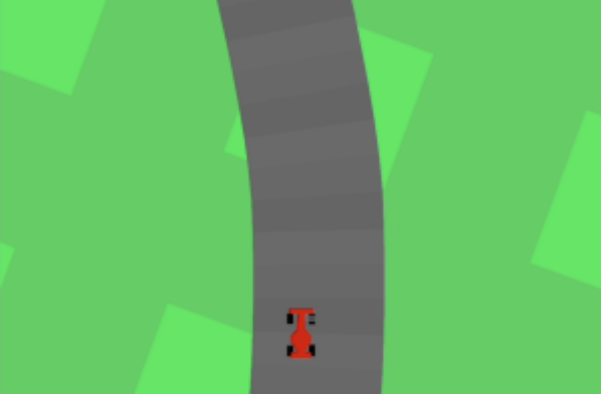

Step 2: Recall the car's learned concepts

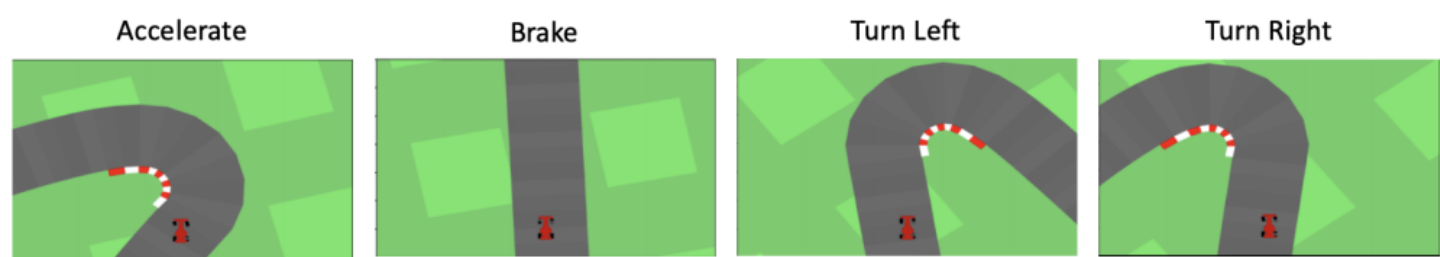

Step 3:

|                                             | Strongly Disagree     |                       |                       |                       | Strongly agree        |
|---------------------------------------------|-----------------------|-----------------------|-----------------------|-----------------------|-----------------------|
| The car will drive safely in this situation | <input type="radio"/> |
| I am confident in this prediction           | <input type="radio"/> |

Question 6

# Question

Step 1: Note the Situation

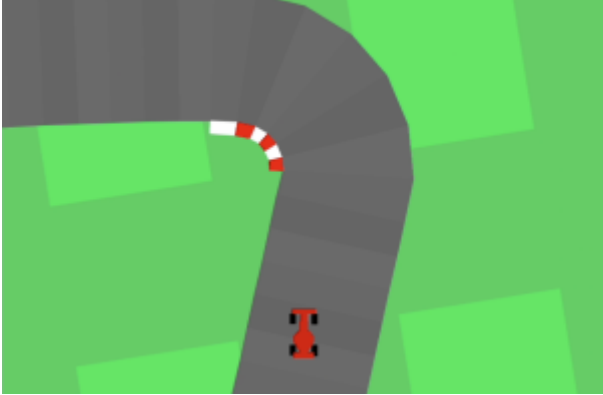

Step 2: Recall the car's learned concepts



Step 3:

|                                             | Strongly Disagree     |                       |                       |                       | Strongly agree        |
|---------------------------------------------|-----------------------|-----------------------|-----------------------|-----------------------|-----------------------|
| The car will drive safely in this situation | <input type="radio"/> |
| I am confident in this prediction           | <input type="radio"/> |

Question 8

# Question

Step 1: Note the Situation



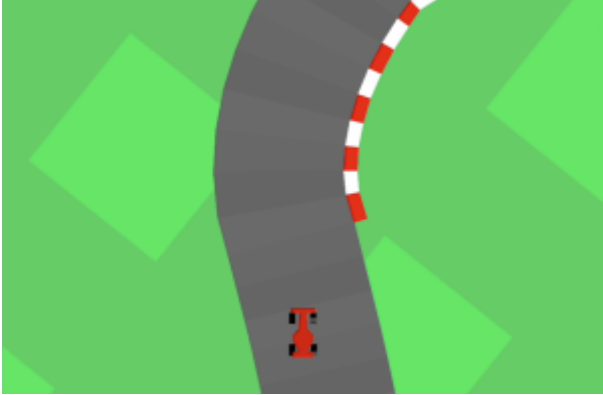

**Step 2:** Recall the car's learned concepts

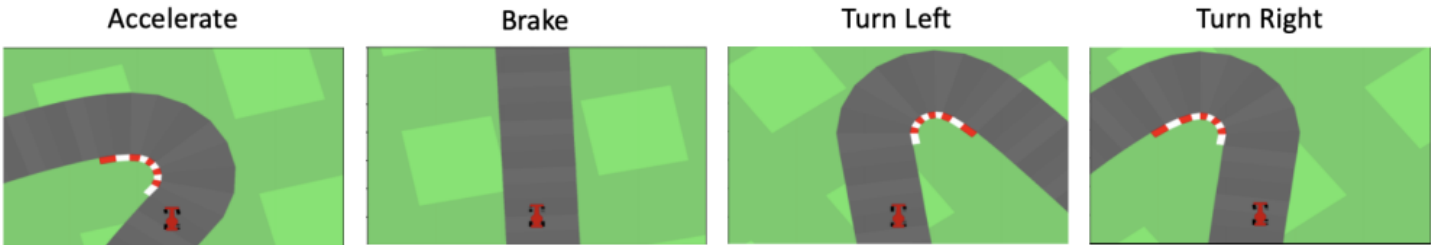

**Step 3:**

|                                             | Strongly Disagree     |                       |                       |                       | Strongly agree        |
|---------------------------------------------|-----------------------|-----------------------|-----------------------|-----------------------|-----------------------|
| The car will drive safely in this situation | <input type="radio"/> |
| I am confident in this prediction           | <input type="radio"/> |

**Question 10**

# Question

**Step 1:** Note the Situation



**Step 2:** Recall the car's learned concepts



**Step 3:**

|                                             | Strongly Disagree     |                       |                       |                       | Strongly agree        |
|---------------------------------------------|-----------------------|-----------------------|-----------------------|-----------------------|-----------------------|
| The car will drive safely in this situation | <input type="radio"/> |
| I am confident in this prediction           | <input type="radio"/> |

**Question 12**

# Question

**Step 1:** Note the Situation

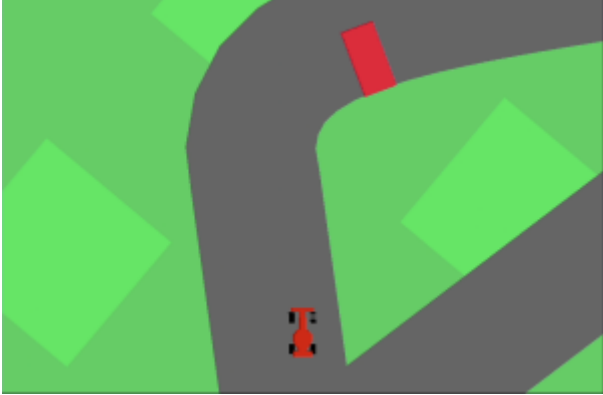

Step 2: Recall the car's learned concepts

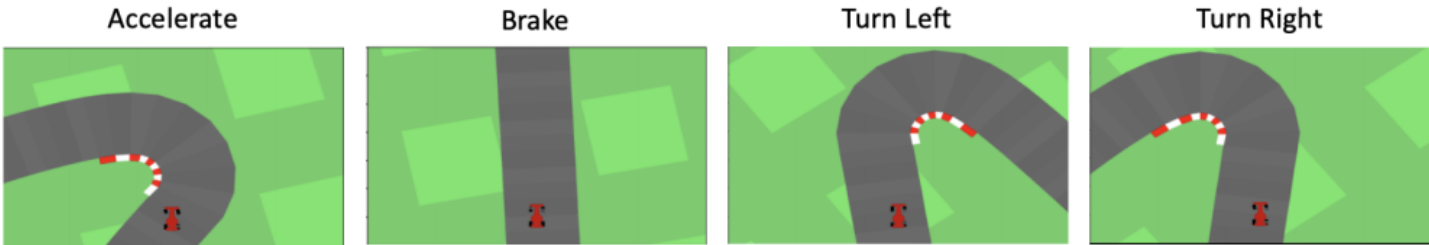

Step 3:

|                                             | Strongly Disagree     |                       |                       |                       | Strongly agree        |
|---------------------------------------------|-----------------------|-----------------------|-----------------------|-----------------------|-----------------------|
| The car will drive safely in this situation | <input type="radio"/> |
| I am confident in this prediction           | <input type="radio"/> |

Question 14

# Question

Step 1: Note the Situation

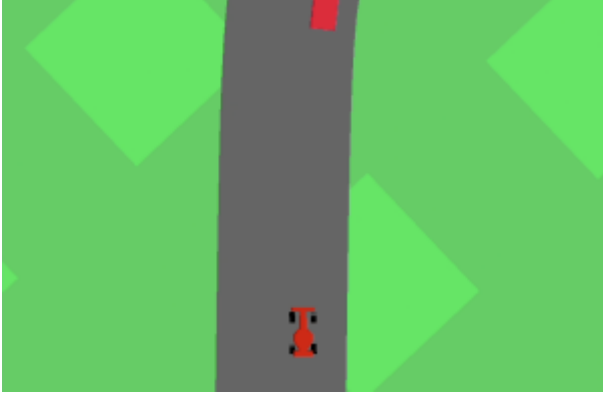

Step 2: Recall the car's learned concepts

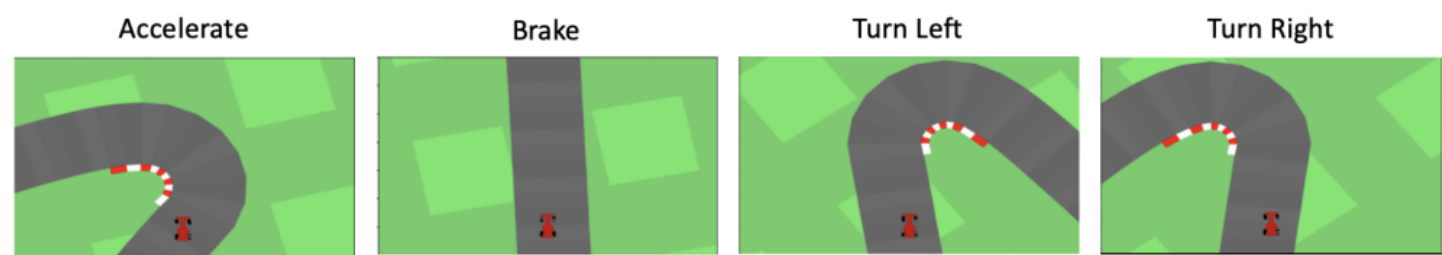

Step 3:

|                                             | Strongly Disagree     |                       |                       |                       | Strongly agree        |
|---------------------------------------------|-----------------------|-----------------------|-----------------------|-----------------------|-----------------------|
| The car will drive safely in this situation | <input type="radio"/> |
| I am confident in this prediction           | <input type="radio"/> |

Question 16

# Question

Step 1: Note the Situation

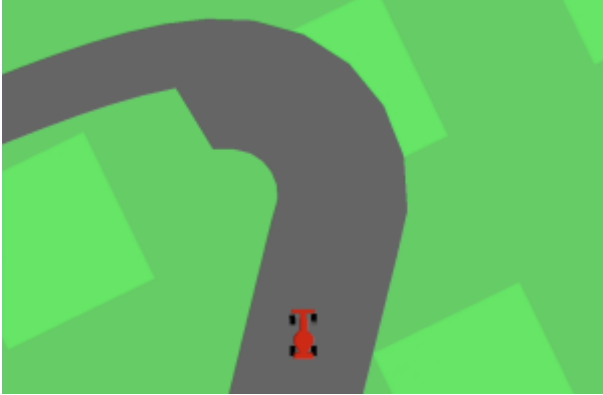

Step 2: Recall the car's learned concepts



Step 3:

|                                             | Strongly Disagree     |                       |                       |                       | Strongly agree        |
|---------------------------------------------|-----------------------|-----------------------|-----------------------|-----------------------|-----------------------|
| The car will drive safely in this situation | <input type="radio"/> |
| I am confident in this prediction           | <input type="radio"/> |

Question 18

# Question

Step 1: Note the Situation

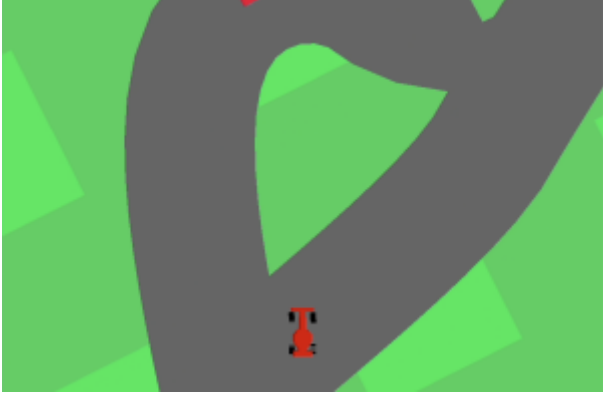

Step 2: Recall the car's learned concepts

Accelerate

Brake

Turn Left

Turn Right

Step 3:

|                                             | Strongly Disagree     |                       |                       |                       | Strongly agree        |
|---------------------------------------------|-----------------------|-----------------------|-----------------------|-----------------------|-----------------------|
| The car will drive safely in this situation | <input type="radio"/> |
| I am confident in this prediction           | <input type="radio"/> |

Question 20

# Question

Step 1: Note the Situation

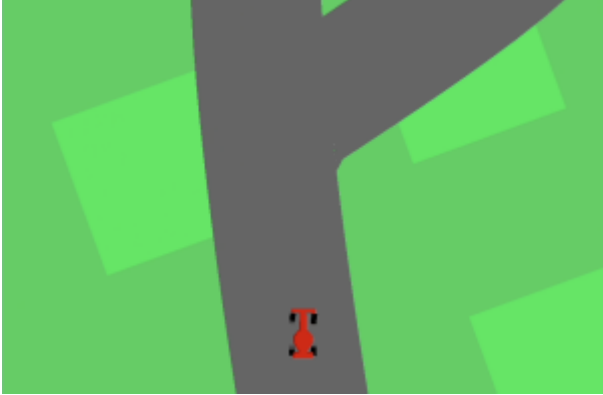

Step 2: Recall the car's learned concepts



Step 3:

|                                             | Strongly Disagree     |                       |                       |                       | Strongly agree        |
|---------------------------------------------|-----------------------|-----------------------|-----------------------|-----------------------|-----------------------|
| The car will drive safely in this situation | <input type="radio"/> |
| I am confident in this prediction           | <input type="radio"/> |

Title safe situations

Thank You For Your Participation!

You Will Now Be Shown Where the Car Drove Safely

Safe situations

The Car Drove Safely In These Situations

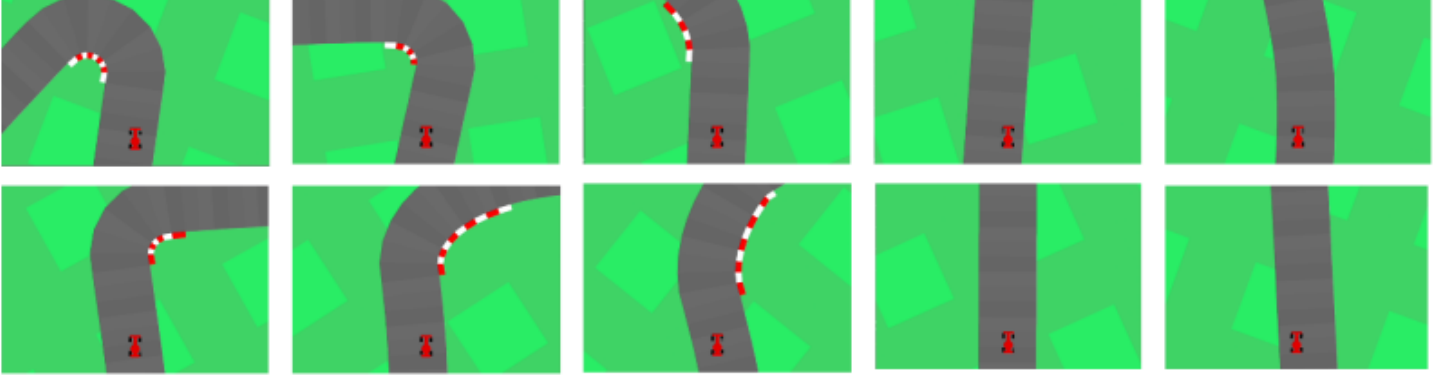

Title crash situations

**Click Next To See The Situations  
The Car Crashed**

Crash situations

**The Car Did Not Drive Safely In These  
Situations**

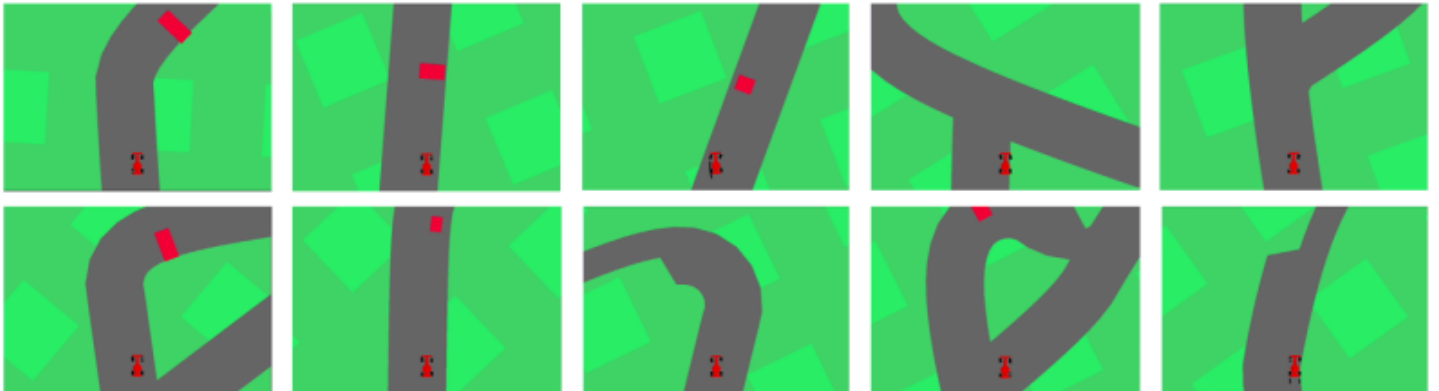

Please... fill out... 2 surveys... to finish

**Next, Please Fill Out Two  
Short Questionnaires**

SUS Questions

Questionnaire 1: The "System" in these questions is referring to the **car** and **concepts**



|                                                                                            | Strongly<br>Disagree  | Somewhat<br>disagree  | Neither agree<br>nor disagree | Somewhat<br>agree     | Strongly<br>agree     |
|--------------------------------------------------------------------------------------------|-----------------------|-----------------------|-------------------------------|-----------------------|-----------------------|
| I think that I would like to use this system frequently.                                   | <input type="radio"/> | <input type="radio"/> | <input type="radio"/>         | <input type="radio"/> | <input type="radio"/> |
| I found the system unnecessarily complex.                                                  | <input type="radio"/> | <input type="radio"/> | <input type="radio"/>         | <input type="radio"/> | <input type="radio"/> |
| I thought the system was easy to use.                                                      | <input type="radio"/> | <input type="radio"/> | <input type="radio"/>         | <input type="radio"/> | <input type="radio"/> |
| I think that I would need the support of a technical person to be able to use this system. | <input type="radio"/> | <input type="radio"/> | <input type="radio"/>         | <input type="radio"/> | <input type="radio"/> |
| I found the various functions in this system were well integrated.                         | <input type="radio"/> | <input type="radio"/> | <input type="radio"/>         | <input type="radio"/> | <input type="radio"/> |
| I thought there was too much inconsistency in the system.                                  | <input type="radio"/> | <input type="radio"/> | <input type="radio"/>         | <input type="radio"/> | <input type="radio"/> |
| I would imagine that most people would learn to use this system very quickly               | <input type="radio"/> | <input type="radio"/> | <input type="radio"/>         | <input type="radio"/> | <input type="radio"/> |
| I found the system very cumbersome to use.                                                 | <input type="radio"/> | <input type="radio"/> | <input type="radio"/>         | <input type="radio"/> | <input type="radio"/> |
| I felt very confident using the system.                                                    | <input type="radio"/> | <input type="radio"/> | <input type="radio"/>         | <input type="radio"/> | <input type="radio"/> |
| I needed to learn a lot of things before I could get going with this system.               | <input type="radio"/> | <input type="radio"/> | <input type="radio"/>         | <input type="radio"/> | <input type="radio"/> |

NASA Questions

Questionnaire 2

|  | Low | High |
|--|-----|------|
|  | 0   | 20   |
|  | 1   |      |
|  | 2   |      |
|  | 3   |      |
|  | 4   |      |
|  | 5   |      |
|  | 6   |      |
|  | 7   |      |
|  | 8   |      |
|  | 9   |      |
|  | 10  |      |
|  | 11  |      |
|  | 12  |      |
|  | 13  |      |
|  | 14  |      |
|  | 15  |      |
|  | 16  |      |
|  | 17  |      |
|  | 18  |      |
|  | 19  |      |
|  | 20  |      |

How mentally  
demanding was the  
task?

How physically  
demanding was the  
task?

How hurried or  
rushed was the pace  
of the task?

How successful  
were you in  
accomplishing what  
you were asked to  
do?

How hard did ou  
have to work to  
accomplish your  
level of  
performance?

How insecure,  
discouraged,  
irritated, stressed,  
and annoyed were  
you?

Block 52

To finish the survey, can you please explain, in your own words, with as much detail as possible, why you think the car crashed sometimes?

Block 42

Debrief Page

Thank you for your participation, this study was designed to evaluate people’s ability to use an explainable artificial intelligence system to predict system failures.
